# Supplementary material
Source: PubMed Central journal article supplement (PMC4299875)
Supplement: NIHMS642077-supplement-Arrays.pdf [file NIHMS642077-supplement-Arrays.pdf]

**Supplementary Table 1.** Missense mutated residues in each cancer gene grouped according to structural location (core or interface) in the encoded protein. Some proteins have co-crystallization structures for multiple distinct interaction interfaces. Since our model does not distinguish between residues at the same structural location, a representative position was selected arbitrarily to represent each group.

| Gene    | Location  | Representative Residue | Other Residues at Same Location |
|---------|-----------|------------------------|---------------------------------|
| PPP2R1A | core      | 220                    | 298                             |
| PPP2R1A | interface | 257                    | 256 179 217                     |
| PPP2R1A | interface | 183                    |                                 |
| PPP2R1A | interface | 41                     | 221                             |
| PPP2R1A | interface | 219                    |                                 |
| PPP2R1A | interface | 258                    |                                 |
| RB1     | interface | 857                    |                                 |
| RB1     | core      | 550                    | 703 488 449 688 654 755         |
| RB1     | interface | 876                    |                                 |
| RB1     | interface | 873                    |                                 |
| SMAD4   | core      | 504                    | 437 499 324 386                 |
| SMAD4   | interface | 337                    | 355 357 356 353 361 382         |
| MSH2    | core      | 356                    | 217                             |
| MSH2    | interface | 83                     | 758                             |
| MSH2    | interface | 543                    |                                 |
| EGFR    | core      | 843                    | 85 742 351 839 789 148 101      |
| EGFR    | interface | 934                    | 937                             |
| EGFR    | interface | 38                     |                                 |
| EGFR    | interface | 377                    | 373 114 441                     |
| EGFR    | interface | 149                    |                                 |
| EGFR    | interface | 652                    |                                 |
| MEN1    | core      | 242                    | 442                             |
| MEN1    | interface | 337                    | 335 159 88                      |
| MEN1    | interface | 96                     |                                 |
| SMAD2   | core      | 335                    |                                 |
| SMAD2   | interface | 398                    |                                 |
| SMAD2   | interface | 450                    | 446                             |
| CTNNB1  | interface | 582                    | 623                             |
| CTNNB1  | core      | 421                    | 517                             |
| CTNNB1  | interface | 170                    | 166 162                         |
| CTNNB1  | interface | 35                     | 34 31 32                        |
| CTNNB1  | interface | 390                    | 429 426 515                     |
| CTNNB1  | interface | 619                    |                                 |
| CTNNB1  | interface | 415                    |                                 |
| CTNNB1  | interface | 383                    |                                 |
| CTNNB1  | interface | 339                    | 342                             |
| CTNNB1  | interface | 257                    | 425 292                         |
| CTNNB1  | interface | 387                    |                                 |
| VHL     | interface | 169                    |                                 |
| VHL     | interface | 109                    | 105 107 88 112 110 115 78       |
| VHL     | interface | 184                    | 165 162 82 153 158              |
| VHL     | interface | 79                     |                                 |
| VHL     | core      | 151                    | 74                              |
| B2M     | core      | 100                    | 47                              |
| B2M     | interface | 51                     | 76 30                           |
| B2M     | interface | 83                     |                                 |
| B2M     | interface | 54                     |                                 |
| CDKN2A  | core      | 52                     | 97 94 20 118 114 81 83 86       |
| CDKN2A  | interface | 53                     | 74 110 44 42 84 87 88           |
| CBL     | core      | 98                     | 186 877                         |
| CBL     | interface | 322                    |                                 |
| CBL     | interface | 418                    | 417 384                         |
| ABL1    | core      | 1060                   | 365 348 111 472                 |
| ABL1    | interface | 72                     |                                 |

|        |           |      |                                               |
|--------|-----------|------|-----------------------------------------------|
| CASP8  | core      | 236  | 325 241                                       |
| CASP8  | interface | 463  | 441 444                                       |
| FLT3   | interface | 311  |                                               |
| FLT3   | core      | 814  | 939                                           |
| DAXX   | interface | 371  |                                               |
| DAXX   | interface | 738  |                                               |
| DAXX   | interface | 127  | 87                                            |
| DAXX   | interface | 280  |                                               |
| DAXX   | interface | 315  | 263 250                                       |
| AXIN1  | core      | 149  |                                               |
| AXIN1  | interface | 385  |                                               |
| AXIN1  | interface | 146  | 139                                           |
| PIK3CA | core      | 359  |                                               |
| PIK3CA | interface | 545  | 546 542 453 454 365 345 79 11 449<br>1029 357 |
| CSF1R  | core      | 613  |                                               |
| CSF1R  | interface | 192  | 250 144                                       |
| KDM6A  | interface | 1087 | 1191                                          |
| KDM6A  | core      | 1119 |                                               |
| PIK3R1 | interface | 669  |                                               |
| PIK3R1 | core      | 646  | 129                                           |
| PIK3R1 | interface | 560  | 564 567 568 464 379 376 574 572               |
| CDH1   | core      | 212  | 260 316                                       |
| CDH1   | interface | 159  |                                               |
| HRAS   | interface | 13   | 61                                            |
| HRAS   | interface | 59   |                                               |
| HRAS   | interface | 12   |                                               |
| FBXW7  | core      | 396  | 398 476 301 558 516 517 437                   |
| FBXW7  | interface | 280  |                                               |
| BRCA1  | core      | 1722 | 1665                                          |
| BRCA1  | interface | 96   |                                               |
| BRCA1  | interface | 1813 | 1699                                          |
| DNMT3A | core      | 737  |                                               |
| DNMT3A | interface | 729  | 771 736                                       |
| DNMT3A | interface | 48   |                                               |
| H3F3A  | interface | 50   | 130                                           |
| H3F3A  | interface | 3    | 9                                             |
| H3F3A  | interface | 56   | 99                                            |
| SPOP   | core      | 277  |                                               |
| SPOP   | interface | 102  | 87 117 131 133                                |
| SPOP   | interface | 281  |                                               |
| MSH6   | core      | 781  | 175 480 457 868                               |
| MSH6   | interface | 1299 |                                               |
| BCOR   | interface | 1649 |                                               |
| BCOR   | interface | 509  |                                               |
| ATRX   | core      | 220  |                                               |
| ATRX   | interface | 263  |                                               |
| FGFR2  | core      | 690  | 634 632 617 611 563 253                       |
| FGFR2  | interface | 165  | 254                                           |
| FGFR2  | interface | 311  |                                               |
| FGFR2  | interface | 252  | 251                                           |
| FGFR2  | interface | 163  |                                               |
| FGFR3  | core      | 677  |                                               |
| FGFR3  | interface | 248  |                                               |
| MLL3   | core      | 359  | 385                                           |
| MLL3   | interface | 4714 |                                               |
| TP53   | core      | 141  | 255 278 279 135 134 266 127                   |
| TP53   | interface | 178  | 179 280 241                                   |
| TP53   | interface | 171  | 177 244                                       |
| TP53   | interface | 181  | 248 243 247 249                               |
| TP53   | interface | 11   |                                               |
| TP53   | interface | 27   |                                               |

|        |           |      |                |
|--------|-----------|------|----------------|
| ERBB2  | core      | 797  | 466 87         |
| ERBB2  | interface | 663  |                |
| PTPN11 | core      | 308  | 472 136        |
| PTPN11 | interface | 181  | 55 52 117      |
| NOTCH1 | core      | 2064 | 1936 2101 2036 |
| NOTCH1 | interface | 1937 |                |
| NOTCH1 | interface | 2038 |                |
| KIT    | core      | 292  | 432            |
| KIT    | interface | 72   | 261            |
| MET    | core      | 1251 | 63 225 263     |
| MET    | interface | 221  | 167            |
| RUNX1  | core      | 91   |                |
| RUNX1  | interface | 114  | 157 108        |
| APC    | core      | 568  |                |
| APC    | interface | 640  |                |
| APC    | interface | 546  |                |
| APC    | interface | 2046 |                |
| APC    | interface | 1527 |                |
| APC    | interface | 593  | 550            |
| APC    | interface | 1583 |                |
| CREBBP | core      | 1782 |                |
| CREBBP | interface | 1122 |                |

---

**Supplementary Table2.** A summary of the spatial distribution (core & interface) of missense mutations hosted on 125 known cancer genes. Distinct Muts describes the number of mutated residue groups that affect different structural locations, PPIs details the number of high confidence interactions for each gene, and 3D PPIs describes the number of structurally resolved complexes in the PDB.

| Gene     | PPIs | 3D PPIs | Core | Interface | Distinct Muts | Gene    | PPIs | 3D PPIs | Core | Interface | Distinct Muts |
|----------|------|---------|------|-----------|---------------|---------|------|---------|------|-----------|---------------|
| ABL1     | 293  | 1       | 5    | 1         | 2             | KDM5C   | 12   | 0       | 0    | 0         | 0             |
| ACVR1B   | 19   | 0       | 0    | 0         | 0             | KDM6A   | 26   | 1       | 1    | 2         | 2             |
| AKT1     | 188  | 1       | 0    | 1         | 1             | KIT     | 60   | 2       | 2    | 2         | 2             |
| ALK      | 50   | 1       | 1    | 0         | 1             | KLF4    | 15   | 0       | 0    | 0         | 0             |
| APC      | 132  | 6       | 1    | 7         | 7             | KRAS    | 24   | 0       | 1    | 0         | 1             |
| AR       | 49   | 4       | 0    | 0         | 0             | MAP2K1  | 46   | 0       | 0    | 0         | 0             |
| ARID1A   | 27   | 0       | 0    | 0         | 0             | MAP3K1  | 37   | 0       | 0    | 0         | 0             |
| ARID1B   | 2    | 0       | 0    | 0         | 0             | MED12   | 33   | 0       | 0    | 0         | 0             |
| ARID2    | 14   | 0       | 0    | 0         | 0             | MEN1    | 50   | 3       | 2    | 5         | 3             |
| ASXL1    | 14   | 0       | 0    | 0         | 0             | MET     | 54   | 3       | 4    | 2         | 2             |
| ATM      | 92   | 0       | 0    | 0         | 0             | MLH1    | 29   | 0       | 1    | 0         | 1             |
| ATRX     | 25   | 2       | 1    | 1         | 2             | MLL2    | 30   | 1       | 0    | 0         | 0             |
| AXIN1    | 69   | 2       | 1    | 3         | 3             | MLL3    | 18   | 1       | 2    | 1         | 2             |
| B2M      | 19   | 15      | 2    | 5         | 4             | MPL     | 8    | 0       | 0    | 0         | 0             |
| BAP1     | 44   | 0       | 0    | 0         | 0             | MSH2    | 44   | 2       | 2    | 3         | 3             |
| BCL2     | 101  | 0       | 0    | 0         | 0             | MSH6    | 30   | 1       | 5    | 1         | 2             |
| BCOR     | 22   | 2       | 0    | 2         | 2             | MYD88   | 36   | 0       | 1    | 0         | 1             |
| BRAF     | 48   | 0       | 5    | 0         | 1             | NCOR1   | 131  | 4       | 0    | 0         | 0             |
| BRCA1    | 228  | 5       | 2    | 3         | 3             | NF1     | 12   | 0       | 1    | 0         | 1             |
| BRCA2    | 51   | 2       | 0    | 1         | 1             | NF2     | 37   | 0       | 1    | 0         | 1             |
| CARD11   | 16   | 0       | 0    | 0         | 0             | NFE2L2  | 34   | 1       | 0    | 4         | 1             |
| CASP8    | 112  | 1       | 3    | 3         | 2             | NOTCH1  | 66   | 2       | 4    | 2         | 3             |
| CBL      | 170  | 8       | 3    | 4         | 3             | NOTCH2  | 19   | 0       | 1    | 0         | 1             |
| CDC73    | 58   | 0       | 0    | 0         | 0             | NPM1    | 107  | 0       | 0    | 0         | 0             |
| CDH1     | 103  | 2       | 3    | 1         | 2             | NRAS    | 23   | 0       | 0    | 0         | 0             |
| CDKN2A   | 103  | 1       | 9    | 9         | 2             | PAX5    | 15   | 0       | 0    | 0         | 0             |
| CEBPA    | 12   | 0       | 0    | 0         | 0             | PBRM1   | 22   | 0       | 5    | 0         | 1             |
| CIC      | 13   | 1       | 0    | 0         | 0             | PDGFRA  | 27   | 0       | 0    | 0         | 0             |
| CREBBP   | 306  | 7       | 1    | 1         | 2             | PHF6    | 1    | 0       | 0    | 0         | 0             |
| CRLF2    | 0    | 0       | 0    | 0         | 0             | PIK3CA  | 50   | 1       | 1    | 12        | 2             |
| CSF1R    | 20   | 1       | 1    | 3         | 2             | PIK3R1  | 253  | 3       | 2    | 10        | 3             |
| CTNNB1   | 242  | 6       | 2    | 22        | 11            | PPP2R1A | 78   | 4       | 2    | 9         | 6             |
| CYLD     | 30   | 0       | 0    | 0         | 0             | PRDM1   | 13   | 0       | 0    | 0         | 0             |
| DAXX     | 86   | 4       | 0    | 8         | 5             | PTCH1   | 6    | 0       | 0    | 0         | 0             |
| DNMT1    | 64   | 0       | 6    | 0         | 1             | PTEN    | 47   | 1       | 18   | 0         | 1             |
| DNMT3A   | 35   | 2       | 1    | 4         | 3             | PTPN11  | 132  | 1       | 3    | 4         | 2             |
| EGFR     | 237  | 7       | 8    | 9         | 6             | RB1     | 194  | 5       | 7    | 3         | 4             |
| EP300    | 352  | 4       | 0    | 0         | 0             | RET     | 42   | 0       | 0    | 0         | 0             |
| ERBB2    | 150  | 4       | 3    | 1         | 2             | RNF43   | 17   | 2       | 0    | 4         | 1             |
| EZH2     | 89   | 0       | 0    | 0         | 0             | RUNX1   | 61   | 1       | 1    | 3         | 2             |
| FAM123B  | 5    | 0       | 0    | 0         | 0             | SETD2   | 7    | 0       | 0    | 0         | 0             |
| FBXW7    | 40   | 1       | 8    | 1         | 2             | SETBP1  | 2    | 0       | 0    | 0         | 0             |
| FGFR2    | 34   | 4       | 7    | 7         | 5             | SF3B1   | 39   | 2       | 0    | 0         | 0             |
| FGFR3    | 47   | 1       | 1    | 1         | 2             | SMAD2   | 233  | 3       | 1    | 3         | 3             |
| FLT3     | 17   | 1       | 2    | 1         | 2             | SMAD4   | 180  | 3       | 5    | 7         | 2             |
| FOXL2    | 4    | 0       | 0    | 0         | 0             | SMARCA4 | 18   | 0       | 0    | 0         | 0             |
| FUBP1    | 14   | 1       | 0    | 0         | 0             | SMARCB1 | 74   | 0       | 0    | 0         | 0             |
| GATA1    | 51   | 0       | 0    | 0         | 0             | SMO     | 3    | 0       | 2    | 0         | 1             |
| GATA2    | 28   | 0       | 0    | 0         | 0             | SOCS1   | 40   | 0       | 0    | 0         | 0             |
| GATA3    | 19   | 0       | 0    | 0         | 0             | SOX9    | 16   | 0       | 0    | 0         | 0             |
| GNA11    | 17   | 0       | 0    | 0         | 0             | SPOP    | 18   | 2       | 1    | 6         | 3             |
| GNAQ     | 42   | 0       | 0    | 0         | 0             | SRSF2   | 4    | 0       | 0    | 0         | 0             |
| GNAS     | 31   | 0       | 0    | 0         | 0             | STAG2   | 11   | 0       | 0    | 0         | 0             |
| H3F3A    | 11   | 9       | 0    | 6         | 3             | STK11   | 40   | 2       | 3    | 0         | 1             |
| HIST1H3B | 0    | 0       | 0    | 0         | 0             | TET2    | 2    | 0       | 0    | 0         | 0             |

|       |     |   |   |   |   |         |     |    |   |    |   |
|-------|-----|---|---|---|---|---------|-----|----|---|----|---|
| HNF1A | 3   | 0 | 0 | 0 | 0 | TNFAIP3 | 50  | 1  | 1 | 0  | 1 |
| HRAS  | 86  | 6 | 0 | 4 | 3 | TRAF7   | 8   | 0  | 0 | 0  | 0 |
| IDH1  | 3   | 0 | 2 | 0 | 1 | TP53    | 565 | 13 | 8 | 14 | 6 |
| IDH2  | 1   | 0 | 3 | 0 | 1 | TSC1    | 46  | 0  | 0 | 0  | 0 |
| JAK1  | 74  | 0 | 2 | 0 | 1 | TSHR    | 21  | 0  | 0 | 0  | 0 |
| JAK2  | 107 | 0 | 1 | 0 | 1 | U2AF1   | 29  | 1  | 2 | 0  | 1 |
| JAK3  | 43  | 0 | 2 | 0 | 1 | VHL     | 107 | 3  | 2 | 16 | 5 |
|       |     |   |   |   |   | WT1     | 5   | 0  | 0 | 0  | 0 |

---

**Supplementary Table 3.** Tissue specificity of cancer gene mutations at core and interface residues. Core or interface regions are identified by the selected representative residue (see Supplementary Table 1). Each core or interface region was assessed for tissue specificity of mutations occurring using a Fisher's Exact test. This table lists results for each of 137 core and interface sites tested. 21% of sites showed a deviation from expected mutation count for one or more cancer types.

| Gene    | Representative Residue | Cancer Tissue                                                                                                                    |
|---------|------------------------|----------------------------------------------------------------------------------------------------------------------------------|
| PPP2R1A | 257                    | Uterine Carcinosarcoma                                                                                                           |
| SMAD4   | 337                    | Colon adenocarcinoma                                                                                                             |
| MEN1    | 337                    | Brain Lower Grade Glioma, Pancreatic adenocarcinoma                                                                              |
| MEN1    | 242                    | Lung squamous cell carcinoma                                                                                                     |
| SMAD2   | 450                    | Bladder Urothelial Carcinoma                                                                                                     |
| CTNNB1  | 619                    | Rectum adenocarcinoma                                                                                                            |
| CTNNB1  | 35                     | Adrenocortical carcinoma, Uterine Corpus Endometrial Carcinoma, Prostate adenocarcinoma                                          |
| CTNNB1  | 421                    | Rectum adenocarcinoma                                                                                                            |
| CTNNB1  | 339                    | Prostate adenocarcinoma                                                                                                          |
| CTNNB1  | 257                    | Cervical squamous cell carcinoma and endocervical adenocarcinoma                                                                 |
| B2M     | 51                     | Rectum adenocarcinoma                                                                                                            |
| DNMT3A  | 729                    | Acute Myeloid Leukemia                                                                                                           |
| CASP8   | 236                    | Cervical squamous cell carcinoma and endocervical adenocarcinoma                                                                 |
| PIK3CA  | 545                    | Breast invasive carcinoma                                                                                                        |
| PIK3R1  | 560                    | Glioblastoma multiforme, Brain Lower Grade Glioma                                                                                |
| PIK3R1  | 646                    | Glioblastoma multiforme                                                                                                          |
| HRAS    | 13                     | Thyroid carcinoma                                                                                                                |
| FBXW7   | 396                    | Uterine Carcinosarcoma                                                                                                           |
| CDKN2A  | 53                     | Head and Neck squamous cell carcinoma                                                                                            |
| CDKN2A  | 52                     | Head and Neck squamous cell carcinoma                                                                                            |
| H3F3A   | 3                      | Cervical squamous cell carcinoma and endocervical adenocarcinoma                                                                 |
| SPOP    | 102                    | Prostate adenocarcinoma                                                                                                          |
| FGFR2   | 252                    | Uterine Corpus Endometrial Carcinoma, Uterine Carcinosarcoma                                                                     |
| FGFR3   | 248                    | Bladder Urothelial Carcinoma                                                                                                     |
| TP53    | 181                    | Glioblastoma multiforme, UC,S Head and Neck squamous cell carcinoma, Brain Lower Grade Glioma, Ovarian serous cystadenocarcinoma |
| TP53    | 141                    | Brain Lower Grade Glioma, Breast invasive carcinoma , Ovarian serous cystadenocarcinoma                                          |
| TP53    | 178                    | Uterine Carcinosarcoma, Brain Lower Grade Glioma, Ovarian serous cystadenocarcinoma                                              |
| TP53    | 171                    | Ovarian serous cystadenocarcinoma                                                                                                |
| RUNX1   | 114                    | Acute Myeloid Leukemia                                                                                                           |

**Supplementary Table 4.** Count of the altered sub-networks and number of proteins in the altered sub-networks recovered for each representative mutation.

| <b>Gene</b> | <b>Residues (# of sub-networks, # of proteins)</b>                                                                                                                                  |
|-------------|-------------------------------------------------------------------------------------------------------------------------------------------------------------------------------------|
| ABL1        | res1060(73,706) ; res72(77,809)                                                                                                                                                     |
| APC         | res1527(55,792); res1583(37,668); res2046(54,788); res546(42,877);<br>res568(43,726); res593(51,806); res640(53,787)                                                                |
| ATRX        | res220(49,544); res263(55,619)                                                                                                                                                      |
| AXIN1       | res146(60,764); res149(46,574); res385(58,770)                                                                                                                                      |
| B2M         | res100(35,601); res51(38,669); res54(38,686); res83(60,1037)                                                                                                                        |
| BCOR        | res1649(77,529); res509(49,662)                                                                                                                                                     |
| BRCA1       | res1722(57,565); res1813(54,625); res96(69,735)                                                                                                                                     |
| CASP8       | res236(42,674); res463(50,770)                                                                                                                                                      |
| CBL         | res322(71,819); res418(78,753); res98(47,638)                                                                                                                                       |
| CDH1        | res159(41,657); res212(41,653)                                                                                                                                                      |
| CDKN2A      | res52(62,576); res53(75,715)                                                                                                                                                        |
| CREBBP      | res1122(62,712); res1782(42,647)                                                                                                                                                    |
| CSF1R       | res192(77,508); res613(60,541)                                                                                                                                                      |
| CTNNB1      | res170(46,746); res257(55,828); res339(46,700); res35(62,808);<br>res383(67,804); res387(53,818); res390(60,805); res415(51,696);<br>res421(43,643); res582(53,685); res619(56,752) |
| DAXX        | res127(56,849); res280(69,662); res315(64,587); res371(53,632);<br>res738(102,580)                                                                                                  |
| DNMT3A      | res48(68,610); res729(66,634); res737(72,534)                                                                                                                                       |
| EGFR        | res149(51,825); res377(63,766); res38(56,770); res652(55,862);<br>res843(56,724); res934(64,771)                                                                                    |
| ERBB2       | res663(66,846); res797(40,692)                                                                                                                                                      |
| FBXW7       | res280(59,798); res396(68,575)                                                                                                                                                      |
| FGFR2       | res163(60,711); res165(46,572); res252(44,619); res311(46,575);<br>res690(42,541)                                                                                                   |
| FGFR3       | res248(72,637); res677(49,585)                                                                                                                                                      |
| FLT3        | res311(74,496); res814(71,445)                                                                                                                                                      |
| H3F3A       | res3(43,659); res50(66,661); res56(76,695)                                                                                                                                          |
| HRAS        | res12(39,791); res61(38,795); res59(28,754)                                                                                                                                         |
| KDM6A       | res1087(59,630); res1119(46,544)                                                                                                                                                    |
| KIT         | res292(48,699); res72(38,628)                                                                                                                                                       |
| MEN1        | res242(66,547); res337(86,603); res96(69,606);                                                                                                                                      |
| MET         | res1251(45,618); res221(40,714)                                                                                                                                                     |
| MLL3        | res359(64,566); res4714(73,669)                                                                                                                                                     |
| MSH2        | res356(50,528); res543(59,536); res83(58,577)                                                                                                                                       |
| MSH6        | res1299(79,626); res781(67,455)                                                                                                                                                     |
| NOTCH1      | res1937(48,648); res2038(54,639); res2064(57,593)                                                                                                                                   |
| PIK3CA9     | res359(46,575); res545(83,712)                                                                                                                                                      |
| PIK3R1      | res560(70,797); res646(71,695); res669(84,830)                                                                                                                                      |
| PPP2R1A     | res183(40,747); res219(45,695); res220(40,660); res257(40,739);<br>res258(47,737); res41(40,713)                                                                                    |
| PTPN11      | res181(46,924); res308(32,720)                                                                                                                                                      |
| RB1         | res550(63,658); res857(69,768); res873(76,740); res876(80,748)                                                                                                                      |
| RUNX1       | res114(40,611); res91(32,575)                                                                                                                                                       |
| SMAD2       | res335(63,625); res398(63,857); res450(73,838)                                                                                                                                      |
| SMAD4       | res337(89,843); res504(54,693)                                                                                                                                                      |
| SPOP        | res102(34,685); res281(32,723); res277(21,656)                                                                                                                                      |
| TP53        | res11(77,591); res141(59,538); res171(72,672); res178(69,586);<br>res181(72,627); res27(89,705)                                                                                     |
| VHL         | res109(40,742); res151(38,647); res169(44,876); res184(36,741);<br>res79(36,775)                                                                                                    |

**Supplementary Table 5.** Validation of functional predictions for mutated residues at distinct locations on the same gene. Via our structural analysis we mapped mutated residues to structural features including the core and different interfaces for a given gene. Structural locations were selected for analysis with our pipeline based on observed missense mutations in the TCGA cohort. The observed mutated residue is reported in the “Residue(s) Mutated in TCGA” column. Residues that were evaluated in unrelated works but that occur in the same structural location (core or interface) as the observed TCGA mutated residue are listed in the “Tested Residues at the Same Structural Location” column. In this work, we assume that all residues within a common structural feature most likely have a similar functional consequence, thus we expect that annotations for other mutated residues within the same protein core, or at the same interface will have the same functional consequences. We list the subset of functional annotations that were specific to the structural location and that coincided with findings of the unrelated works in the “Functional Annotations Specific to Location” column, and the reported consequences found via literature search in the “Validation” column.

| Gene | Tested Residue(s) at the Same Structural Location | Residue(s) Mutated in TCGA | Structural Location | Functional Annotations Specific to Location                                                                                                                                                                                                                                                                                                                                                  | Validation                                                                                                                                        |
|------|---------------------------------------------------|----------------------------|---------------------|----------------------------------------------------------------------------------------------------------------------------------------------------------------------------------------------------------------------------------------------------------------------------------------------------------------------------------------------------------------------------------------------|---------------------------------------------------------------------------------------------------------------------------------------------------|
| APC  | 640                                               | 640                        | KHDRBS1 interaction | GO:0006376~mRNA splice site selection<br>GO:0000245~spliceosome assembly<br>ASF/SF2 in the effected protein set                                                                                                                                                                                                                                                                              | R640G causes exon 14 skipping by disruption of ASF/SF2 binding. <sup>1</sup><br><br>Observed in familial adenomatous polyposis (FAP) <sup>1</sup> |
| APC  | 1495                                              | 1527                       | CTNNB1 interaction  | GO:0019226~transmission of nerve impulse<br>GO:0048168~regulation of neuronal synaptic plasticity<br>GO:0001505~regulation of neurotransmitter levels<br>GO:0051402~neuron apoptosis<br>GO:0006836~neurotransmitter transport<br>GO:0007411~axon guidance<br>GO:0007413~axonal fasciculation<br>GO:0007268~synaptic transmission<br>GO:0045665~negative regulation of neuron differentiation | 1495 mutation is observed in Medulloblastomas <sup>2</sup>                                                                                        |
| ATRX | 220                                               | 220                        | Core Mutation       | GO:0051567~histone H3-K9 methylation                                                                                                                                                                                                                                                                                                                                                         | H3 tails bearing trimethylated Lys9 are required for ATRX localization to pericentric heterochromatin. <sup>3</sup>                               |



|       |            |               |                                 |                                                                                                                                                                                                                                                                                                                                                                                                                                                                                                                                                                                                                                                                                                                                                                                                                                                                                                                                                                                                                  |                                                                                                                                                                                                                                                                                                                                                                                                                                            |
|-------|------------|---------------|---------------------------------|------------------------------------------------------------------------------------------------------------------------------------------------------------------------------------------------------------------------------------------------------------------------------------------------------------------------------------------------------------------------------------------------------------------------------------------------------------------------------------------------------------------------------------------------------------------------------------------------------------------------------------------------------------------------------------------------------------------------------------------------------------------------------------------------------------------------------------------------------------------------------------------------------------------------------------------------------------------------------------------------------------------|--------------------------------------------------------------------------------------------------------------------------------------------------------------------------------------------------------------------------------------------------------------------------------------------------------------------------------------------------------------------------------------------------------------------------------------------|
| ATRX  | 218        | 263           | H3F3A and HIST1H3A interactions | <p>GO:0034983~peptidyl-lysine deacetylation</p> <p>GO:0043984~histone H4-K16 acetylation</p> <p>GO:0043982~histone H4-K8 acetylation</p> <p>GO:0043967~histone H4 acetylation</p> <p>GO:0043983~histone H4-K12 acetylation</p> <p>GO:0043981~histone H4-K5 acetylation</p>                                                                                                                                                                                                                                                                                                                                                                                                                                                                                                                                                                                                                                                                                                                                       | <p>ATRX ADD domain and HP1 are needed for the localization of ATRX protein to heterochromatin.</p> <p>The E218A mutation impairs interaction with histone H3 peptides unmethylated at 'Lys-5' (H3K4me0) but does not reduce the stability of the ADD domain. It does reduce pericentromeric localization.</p> <p>The Acetylation of Lys 4 in H3 histones regulates the interplay between HP1 and ATRX during localization.<sup>4</sup></p> |
| BRCA1 | 1700, 1699 | 1813, 1699    | BRIP1 interaction               | <p>GO:0000731~DNA synthesis during DNA repair</p> <p>GO:0045005~maintenance of fidelity during DNA-dependent DNA replication</p> <p>GO:0000076~DNA replication checkpoint</p> <p>GO:0048478~replication fork protection</p>                                                                                                                                                                                                                                                                                                                                                                                                                                                                                                                                                                                                                                                                                                                                                                                      | <p>The BRCA1–BRIP1–TOPBP1 complex is associated with DNA repair during replication. This complex is necessary for the S-phase checkpoint in response to stalled or collapsed replication forks.<sup>5</sup></p>                                                                                                                                                                                                                            |
| BRCA1 | 22,10      | 96            | BARD1 interaction               | <p>GO:0006978~DNA damage response, signal transduction by p53 class mediator resulting in transcription of p21 class mediator</p>                                                                                                                                                                                                                                                                                                                                                                                                                                                                                                                                                                                                                                                                                                                                                                                                                                                                                | <p>The BRCA1–BARD1 complex is involved in the activation of G1/S, S-phase and G2/M checkpoints. BRCA1–BARD1 depletion compromises the induction of p21 and activation of the G1/S checkpoint in response to ionizing radiation.<sup>6</sup></p>                                                                                                                                                                                            |
| CBL   | 420        | 418, 417, 384 | UBE2D2 interaction              | <p>GO:0042787~protein ubiquitination during ubiquitin-dependent protein catabolic process</p> <p>GO:0043161~proteasomal ubiquitin-dependent protein catabolic process</p> <p>GO:0000209~protein polyubiquitination</p> <p>GO:0031145~anaphase-promoting complex-dependent proteasomal ubiquitin-dependent protein catabolic process</p> <p>GO:0051439~regulation of ubiquitin-protein ligase activity during mitotic cell cycle</p> <p>GO:0051438~regulation of ubiquitin-protein ligase activity</p> <p>GO:0051865~protein autoubiquitination</p> <p>GO:0051437~positive regulation of ubiquitin-protein ligase activity during mitotic cell cycle</p> <p>GO:0051443~positive regulation of ubiquitin-protein ligase activity</p> <p>GO:0051444~negative regulation of ubiquitin-protein ligase activity</p> <p>GO:0032434~regulation of proteasomal ubiquitin-dependent protein catabolic process</p> <p>GO:0016574~histone ubiquitination</p> <p>GO:0031398~positive regulation of protein ubiquitination</p> | <p>R420 is a key site for ubiquitination and degradation of RTKs and loss of function events are frequently observed in myeloid malignancies.<sup>7</sup></p>                                                                                                                                                                                                                                                                              |

---

|     |     |     |                  |                                                                                                                                                                                                                                                                                          |                                                            |
|-----|-----|-----|------------------|------------------------------------------------------------------------------------------------------------------------------------------------------------------------------------------------------------------------------------------------------------------------------------------|------------------------------------------------------------|
|     |     |     |                  | GO:0031396~regulation of protein ubiquitination<br>GO:0051436~negative regulation of ubiquitin-protein ligase activity during mitotic cell cycle                                                                                                                                         |                                                            |
| CBL | 298 | 322 | EGFR interaction | GO:0050868~negative regulation of T cell activation<br>GO:0002758~innate immune response-activating signal transduction<br>GO:0002218~activation of innate immune response<br>GO:0031347~regulation of defense response<br>NFAM1 (NFAT activation molecule 1) present in the protein set | The G298E mutation abolishes NFAT activation. <sup>8</sup> |

---

**Supplementary Table 6.** The list of GO annotations for the protein sets affected by H-RAS 12 perturbation.

| <b>HRAS G12 provoked GO functions</b> |                                                                                                                                                                                                                                                                                                                  |
|---------------------------------------|------------------------------------------------------------------------------------------------------------------------------------------------------------------------------------------------------------------------------------------------------------------------------------------------------------------|
| Cytokine Production                   | positive regulation of interleukin-12 biosynthetic process<br>negative regulation of interleukin-12 production<br>negative regulation of cytokine production<br>cytokinesis<br>regulation of cytokine production during immune response                                                                          |
| GTPase activity                       | activation of Ras GTPase activity<br>positive regulation of Rac GTPase activity<br>regulation of Ras GTPase activity<br>activation of Rho GTPase activity<br>regulation of Rho GTPase activity<br>positive regulation of Rho GTPase activity<br>negative regulation of small GTPase mediated signal transduction |
| Endothelial cells                     | regulation of endothelial cell proliferation<br>endothelial cell differentiation<br>negative regulation of endothelial cell proliferation                                                                                                                                                                        |
| Blood                                 | vasculogenesis<br>positive regulation of blood coagulation<br>vascular process in circulatory system                                                                                                                                                                                                             |
| Proliferation                         | regulation of mesenchymal cell proliferation<br>positive regulation of smooth muscle cell proliferation<br>positive regulation of mesenchymal cell proliferation                                                                                                                                                 |
| Apoptosis                             | positive regulation of cell killing<br>positive regulation of anti-apoptosis<br>induction of apoptosis by oxidative stress<br>induction of apoptosis by intracellular signals<br>regulation of cell killing                                                                                                      |
| Response to Stimulus                  | response to nutrient<br>response to hypoxia<br>response to hydroperoxide<br>response to lipid<br>response to ethanol<br>acute-phase response<br>learning or memory<br>learning<br>response to oxygen levels<br>response to protein stimulus                                                                      |
| Sexual Reproduction                   | oogenesis<br>spermatid differentiation<br>ovulation cycle process<br>gamete generation<br>ovulation cycle<br>sperm motility<br>organelle fission<br>sexual reproduction<br>female gamete generation<br>oocyte differentiation                                                                                    |
| Cell Cycle                            | cell cycle phase<br>regulation of mitosis<br>negative regulation of mitotic cell cycle<br>regulation of mitotic cell cycle                                                                                                                                                                                       |

|                      |                                                                                                                                                                                                                                                                                                                                                                                                                                                                                                                                                                                                                                                                                                                                                                                                                                                                                                                                                                                                                                                                                                                                                                                                                                                                                                                                                                                     |
|----------------------|-------------------------------------------------------------------------------------------------------------------------------------------------------------------------------------------------------------------------------------------------------------------------------------------------------------------------------------------------------------------------------------------------------------------------------------------------------------------------------------------------------------------------------------------------------------------------------------------------------------------------------------------------------------------------------------------------------------------------------------------------------------------------------------------------------------------------------------------------------------------------------------------------------------------------------------------------------------------------------------------------------------------------------------------------------------------------------------------------------------------------------------------------------------------------------------------------------------------------------------------------------------------------------------------------------------------------------------------------------------------------------------|
|                      | <p>M phase of mitotic cell cycle<br/> interphase of mitotic cell cycle<br/> interphase<br/> nuclear division<br/> mitosis</p>                                                                                                                                                                                                                                                                                                                                                                                                                                                                                                                                                                                                                                                                                                                                                                                                                                                                                                                                                                                                                                                                                                                                                                                                                                                       |
| Cell Growth          | <p>regulation of epidermal growth factor receptor activity<br/> positive regulation of cell growth<br/> regulation of developmental growth<br/> response to growth hormone stimulus<br/> transforming growth factor beta receptor signaling pathway<br/> regulation of growth<br/> regulation of cell growth<br/> growth hormone receptor signaling pathway<br/> positive regulation of developmental growth<br/> positive regulation of epidermal growth factor receptor activity</p>                                                                                                                                                                                                                                                                                                                                                                                                                                                                                                                                                                                                                                                                                                                                                                                                                                                                                              |
| Regulatory Processes | <p>regulation of behavior<br/> regulation of protein maturation by peptide bond cleavage<br/> negative regulation of cell-matrix adhesion<br/> regulation of isotype switching<br/> positive regulation of isotype switching<br/> regulation of glycoprotein biosynthetic process<br/> regulation of focal adhesion formation<br/> regulation of metabolic process<br/> regulation of smooth muscle cell proliferation<br/> regulation of microtubule-based process<br/> regulation of receptor-mediated endocytosis<br/> regulation of microtubule-based movement<br/> regulation of protein kinase B signaling cascade<br/> regulation of nuclear division<br/> regulation of cilium beat frequency involved in ciliary motility<br/> positive regulation of macromolecule biosynthetic process<br/> regulation of protein processing<br/> positive regulation of cell-substrate adhesion<br/> positive regulation of behavior<br/> positive regulation of nitric-oxide synthase 2 biosynthetic process<br/> regulation of vasoconstriction<br/> positive regulation of cellular biosynthetic process<br/> regulation of cell cycle process<br/> regulation of nitric-oxide synthase 2 biosynthetic process<br/> regulation of interferon-alpha production<br/> positive regulation of tyrosine phosphorylation of STAT protein<br/> positive regulation of DNA recombination</p> |
| Signaling            | <p>inactivation of MAPK activity<br/> positive regulation of NF-kappaB import into nucleus<br/> positive regulation of JAK-STAT cascade<br/> JAK-STAT cascade<br/> transmembrane receptor protein serine/threonine kinase signaling pathway<br/> positive regulation of protein kinase B signaling cascade<br/> regulation of receptor activity<br/> negative regulation of Ras protein signal transduction</p>                                                                                                                                                                                                                                                                                                                                                                                                                                                                                                                                                                                                                                                                                                                                                                                                                                                                                                                                                                     |
| Component Assembly   | <p>actin filament bundle formation<br/> sensory cilium assembly<br/> membrane raft formation<br/> negative regulation of actin filament bundle formation</p>                                                                                                                                                                                                                                                                                                                                                                                                                                                                                                                                                                                                                                                                                                                                                                                                                                                                                                                                                                                                                                                                                                                                                                                                                        |

|                            |                                                                                                                                                                                                                                                                                                                                                                                                                                                                                                                                                                                                                                                                                                                                                                                                                                                                                                                                                                                                                                                                                                      |
|----------------------------|------------------------------------------------------------------------------------------------------------------------------------------------------------------------------------------------------------------------------------------------------------------------------------------------------------------------------------------------------------------------------------------------------------------------------------------------------------------------------------------------------------------------------------------------------------------------------------------------------------------------------------------------------------------------------------------------------------------------------------------------------------------------------------------------------------------------------------------------------------------------------------------------------------------------------------------------------------------------------------------------------------------------------------------------------------------------------------------------------|
| Mitochondrion Localization | mitochondrion localization, microtubule-mediated<br>mitochondrion transport along microtubule<br>establishment of mitochondrion localization                                                                                                                                                                                                                                                                                                                                                                                                                                                                                                                                                                                                                                                                                                                                                                                                                                                                                                                                                         |
| Homeostasis and Transport  | cellular homeostasis<br>cation homeostasis<br>ion homeostasis<br>calcium ion homeostasis<br>cellular metal ion homeostasis<br>cellular di-, tri-valent inorganic cation homeostasis<br>monovalent inorganic cation homeostasis<br>metal ion homeostasis<br>cellular ion homeostasis<br>cellular cation homeostasis<br>calcium ion transport into cytosol<br>cytosolic calcium ion transport<br>regulation of protein import into nucleus<br>regulation of intracellular transport<br>regulation of intracellular protein transport<br>regulation of nucleocytoplasmic transport<br>cytosolic calcium ion homeostasis<br>cellular chemical homeostasis<br>surfactant homeostasis<br>phagocytosis, engulfment<br>regulation of cilium movement involved in ciliary motility<br>chemical homeostasis within a tissue<br>cellular calcium ion homeostasis<br>di-, tri-valent inorganic cation homeostasis                                                                                                                                                                                                |
| Cell Migration             | cell chemotaxis<br>neutrophil chemotaxis<br>regulation of positive chemotaxis<br>positive regulation of positive chemotaxis<br>regulation of chemotaxis<br>positive regulation of chemotaxis<br>regulation of smooth muscle cell migration                                                                                                                                                                                                                                                                                                                                                                                                                                                                                                                                                                                                                                                                                                                                                                                                                                                           |
| Immune System              | regulation of T-helper 2 type immune response<br>negative regulation of leukocyte activation<br>negative regulation of lymphocyte activation<br>negative regulation of alpha-beta T cell activation<br>regulation of T cell receptor signaling pathway<br>positive regulation of T cell mediated immunity<br>regulation of alpha-beta T cell activation<br>negative regulation of T cell activation<br>positive regulation of humoral immune response mediated by circulating immunoglobulin<br>immune effector process<br>regulation of humoral immune response mediated by circulating immunoglobulin<br>positive regulation of immunoglobulin mediated immune response<br>regulation of immunoglobulin production<br>acute inflammatory response<br>positive regulation of adaptive immune response<br>positive regulation of humoral immune response<br>positive regulation of adaptive immune response based on somatic recombination of immune receptors built from immunoglobulin superfamily domains<br>leukocyte mediated immunity<br>regulation of immunoglobulin mediated immune response |

|                     |                                                                                                                                                                                                                                                                                                                                                                                                                                                                                                                                                                                                                                                                                                                                                                                                                                                                                                                                                                                                                                                                                                                                                                                                                                                                                                                                                                                                                                                                                                                                                                                                                                                                                                                  |
|---------------------|------------------------------------------------------------------------------------------------------------------------------------------------------------------------------------------------------------------------------------------------------------------------------------------------------------------------------------------------------------------------------------------------------------------------------------------------------------------------------------------------------------------------------------------------------------------------------------------------------------------------------------------------------------------------------------------------------------------------------------------------------------------------------------------------------------------------------------------------------------------------------------------------------------------------------------------------------------------------------------------------------------------------------------------------------------------------------------------------------------------------------------------------------------------------------------------------------------------------------------------------------------------------------------------------------------------------------------------------------------------------------------------------------------------------------------------------------------------------------------------------------------------------------------------------------------------------------------------------------------------------------------------------------------------------------------------------------------------|
|                     | <ul style="list-style-type: none"> <li>positive regulation of B cell mediated immunity</li> <li>regulation of B cell mediated immunity</li> </ul>                                                                                                                                                                                                                                                                                                                                                                                                                                                                                                                                                                                                                                                                                                                                                                                                                                                                                                                                                                                                                                                                                                                                                                                                                                                                                                                                                                                                                                                                                                                                                                |
| Development         | <ul style="list-style-type: none"> <li>regulation of cell development</li> <li>striated muscle tissue development</li> <li>skeletal muscle tissue development</li> <li>lung alveolus development</li> <li>neural tube development</li> <li>limbic system development</li> <li>olfactory lobe development</li> <li>oocyte development</li> <li>embryonic development</li> <li>epithelium development</li> <li>skeletal muscle organ development</li> <li>branching morphogenesis of a tube</li> <li>myeloid cell differentiation</li> <li>myeloid leukocyte differentiation</li> <li>negative regulation of T-helper cell differentiation</li> <li>alpha-beta T cell differentiation</li> <li>positive regulation of T cell differentiation</li> <li>regulation of T-helper 2 cell differentiation</li> <li>negative regulation of cell development</li> <li>positive regulation of alpha-beta T cell differentiation</li> <li>regulation of alpha-beta T cell differentiation</li> <li>regulation of T-helper cell differentiation</li> <li>regulation of T cell differentiation</li> <li>negative regulation of CD4-positive, alpha beta T cell differentiation</li> <li>negative regulation of alpha-beta T cell differentiation</li> <li>positive regulation of muscle cell differentiation</li> <li>mammary gland morphogenesis</li> <li>mammary gland involution</li> <li>tissue morphogenesis</li> <li>morphogenesis of a branching structure</li> <li>brain morphogenesis</li> <li>cell maturation</li> <li>neuromuscular junction development</li> <li>convergent extension</li> <li>convergent extension involved in gastrulation</li> <li>heart development</li> <li>subpallium development</li> </ul> |
| Metabolic Process   | <ul style="list-style-type: none"> <li>triglyceride metabolic process</li> <li>regulation of cellular metabolic process</li> <li>negative regulation of macromolecule metabolic process</li> <li>organic ether metabolic process</li> <li>receptor metabolic process</li> <li>acylglycerol metabolic process</li> <li>regulation of cAMP metabolic process</li> <li>regulation of cAMP biosynthetic process</li> <li>neutral lipid metabolic process</li> <li>glycerol ether metabolic process</li> </ul>                                                                                                                                                                                                                                                                                                                                                                                                                                                                                                                                                                                                                                                                                                                                                                                                                                                                                                                                                                                                                                                                                                                                                                                                        |
| Neurological System | <ul style="list-style-type: none"> <li>axon ensheathment</li> <li>negative regulation of axonogenesis</li> <li>response to axon injury</li> <li>retinal ganglion cell axon guidance</li> <li>regulation of axon extension</li> </ul>                                                                                                                                                                                                                                                                                                                                                                                                                                                                                                                                                                                                                                                                                                                                                                                                                                                                                                                                                                                                                                                                                                                                                                                                                                                                                                                                                                                                                                                                             |

regulation of membrane potential  
positive regulation of axon extension  
regulation of neuron differentiation  
ensheathment of neurons  
central nervous system neuron differentiation  
negative regulation of neurogenesis

---

Other

establishment or maintenance of epithelial cell apical/basal polarity

---

**Supplementary Table 7.** The list of protein sets (in Entrez Gene Ids) affected by H-RAS G12 perturbation.

| HRAS G12 mutation disturbed protein sets |                                                                                                                                                                                                                                                                                                                                                                                                                                                                                                                                                                                                                                                                                                                                                                                                                                                                                                                                                                                                                                                                                                                                                                                                                                                                                                                                                                                                                                                                                                                                                                                                                                                                                                                                                                                                                                                                                                                                                                                                                                                                                                                                                                                                                                                                                                                                                                                                                                                                                                                                                                                                                                                                                                                                                                                                                                                                                                                                                                                                                                                                                                                                                                                                                                                                                                                                                                                                                                                                                                                                                                                                                  |
|------------------------------------------|------------------------------------------------------------------------------------------------------------------------------------------------------------------------------------------------------------------------------------------------------------------------------------------------------------------------------------------------------------------------------------------------------------------------------------------------------------------------------------------------------------------------------------------------------------------------------------------------------------------------------------------------------------------------------------------------------------------------------------------------------------------------------------------------------------------------------------------------------------------------------------------------------------------------------------------------------------------------------------------------------------------------------------------------------------------------------------------------------------------------------------------------------------------------------------------------------------------------------------------------------------------------------------------------------------------------------------------------------------------------------------------------------------------------------------------------------------------------------------------------------------------------------------------------------------------------------------------------------------------------------------------------------------------------------------------------------------------------------------------------------------------------------------------------------------------------------------------------------------------------------------------------------------------------------------------------------------------------------------------------------------------------------------------------------------------------------------------------------------------------------------------------------------------------------------------------------------------------------------------------------------------------------------------------------------------------------------------------------------------------------------------------------------------------------------------------------------------------------------------------------------------------------------------------------------------------------------------------------------------------------------------------------------------------------------------------------------------------------------------------------------------------------------------------------------------------------------------------------------------------------------------------------------------------------------------------------------------------------------------------------------------------------------------------------------------------------------------------------------------------------------------------------------------------------------------------------------------------------------------------------------------------------------------------------------------------------------------------------------------------------------------------------------------------------------------------------------------------------------------------------------------------------------------------------------------------------------------------------------------|
| Set 1                                    | 65095 134728 55614 4301 6721 83937 10454 10513 9777 27289 3556 3554 7305 4145 1943 11261 1946 4140 1944 1945 55763 54915 3993 817 165918 11186 1621 123920 85406 7128 7126 7049 10209 5267 4733 2318 81539 1063 5269 55227 154796 56241 5911 5910 5912 145957 596 1122 4656 6383 493856 2549 91754 114609 6478 81622 2260 200894 10332 4214 115207 115209 445 7866 1949 51507 23541 23095 5774 5777 6271 85021 2045 2041 163033 2049 9411 644 9551 1937 434 2160 54496 10411 10146 11266 11346 11340 1901 8195 7265 100820829 7266 266747 847 23433 6610 10567 2633 10241 9021 57142 10841 5229 6753 4076 84941 5818 5819 5790 8835 22882 8831 29889 2912 2065 4619 238 4615 23263 2342 79009 5457 5924 5921 5923 157310 27342 9118 5788 613 4254 54106 3703 4916 4915 91662 29109 7189 64127 1476 8649 81609 8427 10067 9369 9363 3416 23613 51479 5074 27 9833 1839 6477 7694 1373 91057 25945 409 7441 462 84632 1956 50855 7342 6714 3562 3563 3249 3566 84331 3565 93145 51277 3845 54514 54922 7529 6655 6850 2905 2909 84446 393 392 390 10235 394 7039 58491 3303 6780 5256 5257 2069 6789 6788 2064 51196 5315 10879 64848 84206 585 583 64112 3156 11083 1437 971 924 1438 1439 8729 2066 149428 1003 1002 8503 8502 3595 64284 9240 283349 23558 23559 79577 23463 178 4926 6921 6923 53916 11156 2886 2057 6285 2888 6281 3697 23011 183 57106 2 185 7988 26036 1509 3083 5868 2622 53343 2769 22800 5894 10395 11336 11339 5899 23233 387755 1915 5104 19 92609 867 84181 6386 5863 55288 3082 155061 2690 84643 10276 3903 55201 83593 889 3909 4763 6628 10576 10572 407 1969 8764 11244 1613 24148 55704 50628 5803 51497 2876 81793 204851 7108 1501 84313 166379 1047 5364 5365 2339 7064 6134 5934 1942 150084 3717 1268 23511 57521 663 9475 104 5898 22808 3654 11059 3656 29984 6002 2487 85463 117178 8651 11311 8655 1460 2242 995 994 5345 9278 5147 9372 998 5140 4887 7535 22920 51562 8531 8533 4233 4232 27071 56886 5590 1400 5595 5597 5596 79874 170685 55644 2147 929 6259 91608 259173 921 923 1380 925 23286 79665 91404 10333 150372 221527 9093 23265 9657 9655 9712 10125 3579 54933 8887 3570 55423 369 80351 6440 27143 64759 28956 382 5585 23411 387 388 389 6678 5328 84067 5871 5877 5879 4359 604 60485 576 8741 56997 56288 27429 7096 7097 2202 64581 81607 2208 2560 57679 102723859 7098 7099 10912 115352 51135 115727 2046 30000 23643 10640 203259 3689 3688 4682 11140 80176 11060 5578 56896 166824 57176 1514 26128 9616 5294 54476 5293 5290 54472 8408 5880 246330 5055 9223 6553 51555 2036 6224 3183 4843 26959 27106 285971 389015 326624 114790 23450 9046 10507 10469 84251 26469 84256 4155 4012 55770 80305 54908 51096 83452 9922 342371 55914 10718 9429 5270 6640 6641 27165 5900 939 5906 84552 5908 5909 23071 6990 673 55824 575 5510 95 6014 6016 6018 6390 79738 29907 63928 2778 10049 8036 23677 4893 4892 2773 2775 2776 5605 5604 6453 10072 8522 22913 7879 8525 4800 59307 353376 26015 9463 421 23179 9542 6303 26019 309 3959 3958 3816 3817 3815 3818 3956 11213 10781 3265 10038 4110 3266 3268 11218 23258 9311 284996 826 4294 22866 54437 51028 80342 4609 387119 131890 84662 117583 5331 6604 5336 7016 10253 399687 10256 27241 84951 81488 4067 6768 1730 2770 84612 5780 5781 5783 54386 51735 55319 140691 8772 60493 56704 29899 225689 6885 6881 79370 149371 7082 7163 1184 7161 80270 6693 10313 10928 23533 23109 9101 3739 59349 3730 9135 85444 951 11178 9770 57162 399664 1445 57161 1114 23037 81848 1448 5289 9138 9649 57003 22827 8412 57002 84164 22821 377630 6549 84767 1364 3192 6237 9519 9693 4582 |
| Set 2                                    | 221150 202 7813 6790 3619 83903 332 9793 5347 51560 9212 10112 55139 9903                                                                                                                                                                                                                                                                                                                                                                                                                                                                                                                                                                                                                                                                                                                                                                                                                                                                                                                                                                                                                                                                                                                                                                                                                                                                                                                                                                                                                                                                                                                                                                                                                                                                                                                                                                                                                                                                                                                                                                                                                                                                                                                                                                                                                                                                                                                                                                                                                                                                                                                                                                                                                                                                                                                                                                                                                                                                                                                                                                                                                                                                                                                                                                                                                                                                                                                                                                                                                                                                                                                                        |
| Set 3                                    | 3611 57118 9459 993 1850 90462 6660 54540 5599 29780 1033 8260                                                                                                                                                                                                                                                                                                                                                                                                                                                                                                                                                                                                                                                                                                                                                                                                                                                                                                                                                                                                                                                                                                                                                                                                                                                                                                                                                                                                                                                                                                                                                                                                                                                                                                                                                                                                                                                                                                                                                                                                                                                                                                                                                                                                                                                                                                                                                                                                                                                                                                                                                                                                                                                                                                                                                                                                                                                                                                                                                                                                                                                                                                                                                                                                                                                                                                                                                                                                                                                                                                                                                   |
| Set 4                                    | 5029 2277 9368 2324 3693 3791 2321 7424 7422                                                                                                                                                                                                                                                                                                                                                                                                                                                                                                                                                                                                                                                                                                                                                                                                                                                                                                                                                                                                                                                                                                                                                                                                                                                                                                                                                                                                                                                                                                                                                                                                                                                                                                                                                                                                                                                                                                                                                                                                                                                                                                                                                                                                                                                                                                                                                                                                                                                                                                                                                                                                                                                                                                                                                                                                                                                                                                                                                                                                                                                                                                                                                                                                                                                                                                                                                                                                                                                                                                                                                                     |
| Set 5                                    | 5159 5155 5154 1845 11333 417 80310                                                                                                                                                                                                                                                                                                                                                                                                                                                                                                                                                                                                                                                                                                                                                                                                                                                                                                                                                                                                                                                                                                                                                                                                                                                                                                                                                                                                                                                                                                                                                                                                                                                                                                                                                                                                                                                                                                                                                                                                                                                                                                                                                                                                                                                                                                                                                                                                                                                                                                                                                                                                                                                                                                                                                                                                                                                                                                                                                                                                                                                                                                                                                                                                                                                                                                                                                                                                                                                                                                                                                                              |
| Set 6                                    | 857 2319 858 7851 2804 3301                                                                                                                                                                                                                                                                                                                                                                                                                                                                                                                                                                                                                                                                                                                                                                                                                                                                                                                                                                                                                                                                                                                                                                                                                                                                                                                                                                                                                                                                                                                                                                                                                                                                                                                                                                                                                                                                                                                                                                                                                                                                                                                                                                                                                                                                                                                                                                                                                                                                                                                                                                                                                                                                                                                                                                                                                                                                                                                                                                                                                                                                                                                                                                                                                                                                                                                                                                                                                                                                                                                                                                                      |
| Set 7                                    | 151295 3480 9365 342574 6876 3643                                                                                                                                                                                                                                                                                                                                                                                                                                                                                                                                                                                                                                                                                                                                                                                                                                                                                                                                                                                                                                                                                                                                                                                                                                                                                                                                                                                                                                                                                                                                                                                                                                                                                                                                                                                                                                                                                                                                                                                                                                                                                                                                                                                                                                                                                                                                                                                                                                                                                                                                                                                                                                                                                                                                                                                                                                                                                                                                                                                                                                                                                                                                                                                                                                                                                                                                                                                                                                                                                                                                                                                |
| Set 8                                    | 4716 967 26056 10806 7248                                                                                                                                                                                                                                                                                                                                                                                                                                                                                                                                                                                                                                                                                                                                                                                                                                                                                                                                                                                                                                                                                                                                                                                                                                                                                                                                                                                                                                                                                                                                                                                                                                                                                                                                                                                                                                                                                                                                                                                                                                                                                                                                                                                                                                                                                                                                                                                                                                                                                                                                                                                                                                                                                                                                                                                                                                                                                                                                                                                                                                                                                                                                                                                                                                                                                                                                                                                                                                                                                                                                                                                        |
| Set 9                                    | 7706 50852 7051 5920 28998                                                                                                                                                                                                                                                                                                                                                                                                                                                                                                                                                                                                                                                                                                                                                                                                                                                                                                                                                                                                                                                                                                                                                                                                                                                                                                                                                                                                                                                                                                                                                                                                                                                                                                                                                                                                                                                                                                                                                                                                                                                                                                                                                                                                                                                                                                                                                                                                                                                                                                                                                                                                                                                                                                                                                                                                                                                                                                                                                                                                                                                                                                                                                                                                                                                                                                                                                                                                                                                                                                                                                                                       |
| Set 10                                   | 3084 5867 7448 57732 1950                                                                                                                                                                                                                                                                                                                                                                                                                                                                                                                                                                                                                                                                                                                                                                                                                                                                                                                                                                                                                                                                                                                                                                                                                                                                                                                                                                                                                                                                                                                                                                                                                                                                                                                                                                                                                                                                                                                                                                                                                                                                                                                                                                                                                                                                                                                                                                                                                                                                                                                                                                                                                                                                                                                                                                                                                                                                                                                                                                                                                                                                                                                                                                                                                                                                                                                                                                                                                                                                                                                                                                                        |
| Set 11                                   | 4512 8834 2232 1327 3329                                                                                                                                                                                                                                                                                                                                                                                                                                                                                                                                                                                                                                                                                                                                                                                                                                                                                                                                                                                                                                                                                                                                                                                                                                                                                                                                                                                                                                                                                                                                                                                                                                                                                                                                                                                                                                                                                                                                                                                                                                                                                                                                                                                                                                                                                                                                                                                                                                                                                                                                                                                                                                                                                                                                                                                                                                                                                                                                                                                                                                                                                                                                                                                                                                                                                                                                                                                                                                                                                                                                                                                         |
| Set 12                                   | 1762 23564 27037 3659 481                                                                                                                                                                                                                                                                                                                                                                                                                                                                                                                                                                                                                                                                                                                                                                                                                                                                                                                                                                                                                                                                                                                                                                                                                                                                                                                                                                                                                                                                                                                                                                                                                                                                                                                                                                                                                                                                                                                                                                                                                                                                                                                                                                                                                                                                                                                                                                                                                                                                                                                                                                                                                                                                                                                                                                                                                                                                                                                                                                                                                                                                                                                                                                                                                                                                                                                                                                                                                                                                                                                                                                                        |
| Set 13                                   | 7074 4830 9479 286                                                                                                                                                                                                                                                                                                                                                                                                                                                                                                                                                                                                                                                                                                                                                                                                                                                                                                                                                                                                                                                                                                                                                                                                                                                                                                                                                                                                                                                                                                                                                                                                                                                                                                                                                                                                                                                                                                                                                                                                                                                                                                                                                                                                                                                                                                                                                                                                                                                                                                                                                                                                                                                                                                                                                                                                                                                                                                                                                                                                                                                                                                                                                                                                                                                                                                                                                                                                                                                                                                                                                                                               |
| Set 14                                   | 4055 26173 10522 2273                                                                                                                                                                                                                                                                                                                                                                                                                                                                                                                                                                                                                                                                                                                                                                                                                                                                                                                                                                                                                                                                                                                                                                                                                                                                                                                                                                                                                                                                                                                                                                                                                                                                                                                                                                                                                                                                                                                                                                                                                                                                                                                                                                                                                                                                                                                                                                                                                                                                                                                                                                                                                                                                                                                                                                                                                                                                                                                                                                                                                                                                                                                                                                                                                                                                                                                                                                                                                                                                                                                                                                                            |
| Set 15                                   | 10006 916 79574 952                                                                                                                                                                                                                                                                                                                                                                                                                                                                                                                                                                                                                                                                                                                                                                                                                                                                                                                                                                                                                                                                                                                                                                                                                                                                                                                                                                                                                                                                                                                                                                                                                                                                                                                                                                                                                                                                                                                                                                                                                                                                                                                                                                                                                                                                                                                                                                                                                                                                                                                                                                                                                                                                                                                                                                                                                                                                                                                                                                                                                                                                                                                                                                                                                                                                                                                                                                                                                                                                                                                                                                                              |
| Set 16                                   | 1436 146433 8563 27258                                                                                                                                                                                                                                                                                                                                                                                                                                                                                                                                                                                                                                                                                                                                                                                                                                                                                                                                                                                                                                                                                                                                                                                                                                                                                                                                                                                                                                                                                                                                                                                                                                                                                                                                                                                                                                                                                                                                                                                                                                                                                                                                                                                                                                                                                                                                                                                                                                                                                                                                                                                                                                                                                                                                                                                                                                                                                                                                                                                                                                                                                                                                                                                                                                                                                                                                                                                                                                                                                                                                                                                           |
| Set 17                                   | 55506 2146 480                                                                                                                                                                                                                                                                                                                                                                                                                                                                                                                                                                                                                                                                                                                                                                                                                                                                                                                                                                                                                                                                                                                                                                                                                                                                                                                                                                                                                                                                                                                                                                                                                                                                                                                                                                                                                                                                                                                                                                                                                                                                                                                                                                                                                                                                                                                                                                                                                                                                                                                                                                                                                                                                                                                                                                                                                                                                                                                                                                                                                                                                                                                                                                                                                                                                                                                                                                                                                                                                                                                                                                                                   |
| Set 18                                   | 221178 10657 117153                                                                                                                                                                                                                                                                                                                                                                                                                                                                                                                                                                                                                                                                                                                                                                                                                                                                                                                                                                                                                                                                                                                                                                                                                                                                                                                                                                                                                                                                                                                                                                                                                                                                                                                                                                                                                                                                                                                                                                                                                                                                                                                                                                                                                                                                                                                                                                                                                                                                                                                                                                                                                                                                                                                                                                                                                                                                                                                                                                                                                                                                                                                                                                                                                                                                                                                                                                                                                                                                                                                                                                                              |
| Set 19                                   | 9367 2664 6009                                                                                                                                                                                                                                                                                                                                                                                                                                                                                                                                                                                                                                                                                                                                                                                                                                                                                                                                                                                                                                                                                                                                                                                                                                                                                                                                                                                                                                                                                                                                                                                                                                                                                                                                                                                                                                                                                                                                                                                                                                                                                                                                                                                                                                                                                                                                                                                                                                                                                                                                                                                                                                                                                                                                                                                                                                                                                                                                                                                                                                                                                                                                                                                                                                                                                                                                                                                                                                                                                                                                                                                                   |
| Set 20                                   | 25804 2922 6635                                                                                                                                                                                                                                                                                                                                                                                                                                                                                                                                                                                                                                                                                                                                                                                                                                                                                                                                                                                                                                                                                                                                                                                                                                                                                                                                                                                                                                                                                                                                                                                                                                                                                                                                                                                                                                                                                                                                                                                                                                                                                                                                                                                                                                                                                                                                                                                                                                                                                                                                                                                                                                                                                                                                                                                                                                                                                                                                                                                                                                                                                                                                                                                                                                                                                                                                                                                                                                                                                                                                                                                                  |
| Set 21                                   | 84174 1435 919                                                                                                                                                                                                                                                                                                                                                                                                                                                                                                                                                                                                                                                                                                                                                                                                                                                                                                                                                                                                                                                                                                                                                                                                                                                                                                                                                                                                                                                                                                                                                                                                                                                                                                                                                                                                                                                                                                                                                                                                                                                                                                                                                                                                                                                                                                                                                                                                                                                                                                                                                                                                                                                                                                                                                                                                                                                                                                                                                                                                                                                                                                                                                                                                                                                                                                                                                                                                                                                                                                                                                                                                   |
| Set 22                                   | 9722 8224 6853                                                                                                                                                                                                                                                                                                                                                                                                                                                                                                                                                                                                                                                                                                                                                                                                                                                                                                                                                                                                                                                                                                                                                                                                                                                                                                                                                                                                                                                                                                                                                                                                                                                                                                                                                                                                                                                                                                                                                                                                                                                                                                                                                                                                                                                                                                                                                                                                                                                                                                                                                                                                                                                                                                                                                                                                                                                                                                                                                                                                                                                                                                                                                                                                                                                                                                                                                                                                                                                                                                                                                                                                   |
| Set 23                                   | 10044 84433                                                                                                                                                                                                                                                                                                                                                                                                                                                                                                                                                                                                                                                                                                                                                                                                                                                                                                                                                                                                                                                                                                                                                                                                                                                                                                                                                                                                                                                                                                                                                                                                                                                                                                                                                                                                                                                                                                                                                                                                                                                                                                                                                                                                                                                                                                                                                                                                                                                                                                                                                                                                                                                                                                                                                                                                                                                                                                                                                                                                                                                                                                                                                                                                                                                                                                                                                                                                                                                                                                                                                                                                      |
| Set 24                                   | 5869 9610                                                                                                                                                                                                                                                                                                                                                                                                                                                                                                                                                                                                                                                                                                                                                                                                                                                                                                                                                                                                                                                                                                                                                                                                                                                                                                                                                                                                                                                                                                                                                                                                                                                                                                                                                                                                                                                                                                                                                                                                                                                                                                                                                                                                                                                                                                                                                                                                                                                                                                                                                                                                                                                                                                                                                                                                                                                                                                                                                                                                                                                                                                                                                                                                                                                                                                                                                                                                                                                                                                                                                                                                        |
| Set 25                                   | 2077 2048                                                                                                                                                                                                                                                                                                                                                                                                                                                                                                                                                                                                                                                                                                                                                                                                                                                                                                                                                                                                                                                                                                                                                                                                                                                                                                                                                                                                                                                                                                                                                                                                                                                                                                                                                                                                                                                                                                                                                                                                                                                                                                                                                                                                                                                                                                                                                                                                                                                                                                                                                                                                                                                                                                                                                                                                                                                                                                                                                                                                                                                                                                                                                                                                                                                                                                                                                                                                                                                                                                                                                                                                        |
| Set 26                                   | 26228 7006                                                                                                                                                                                                                                                                                                                                                                                                                                                                                                                                                                                                                                                                                                                                                                                                                                                                                                                                                                                                                                                                                                                                                                                                                                                                                                                                                                                                                                                                                                                                                                                                                                                                                                                                                                                                                                                                                                                                                                                                                                                                                                                                                                                                                                                                                                                                                                                                                                                                                                                                                                                                                                                                                                                                                                                                                                                                                                                                                                                                                                                                                                                                                                                                                                                                                                                                                                                                                                                                                                                                                                                                       |
| Set 27                                   | 25763 3064                                                                                                                                                                                                                                                                                                                                                                                                                                                                                                                                                                                                                                                                                                                                                                                                                                                                                                                                                                                                                                                                                                                                                                                                                                                                                                                                                                                                                                                                                                                                                                                                                                                                                                                                                                                                                                                                                                                                                                                                                                                                                                                                                                                                                                                                                                                                                                                                                                                                                                                                                                                                                                                                                                                                                                                                                                                                                                                                                                                                                                                                                                                                                                                                                                                                                                                                                                                                                                                                                                                                                                                                       |
| Set 28                                   | 2533 280636                                                                                                                                                                                                                                                                                                                                                                                                                                                                                                                                                                                                                                                                                                                                                                                                                                                                                                                                                                                                                                                                                                                                                                                                                                                                                                                                                                                                                                                                                                                                                                                                                                                                                                                                                                                                                                                                                                                                                                                                                                                                                                                                                                                                                                                                                                                                                                                                                                                                                                                                                                                                                                                                                                                                                                                                                                                                                                                                                                                                                                                                                                                                                                                                                                                                                                                                                                                                                                                                                                                                                                                                      |
| Set 29                                   | 8543 10461                                                                                                                                                                                                                                                                                                                                                                                                                                                                                                                                                                                                                                                                                                                                                                                                                                                                                                                                                                                                                                                                                                                                                                                                                                                                                                                                                                                                                                                                                                                                                                                                                                                                                                                                                                                                                                                                                                                                                                                                                                                                                                                                                                                                                                                                                                                                                                                                                                                                                                                                                                                                                                                                                                                                                                                                                                                                                                                                                                                                                                                                                                                                                                                                                                                                                                                                                                                                                                                                                                                                                                                                       |
| Set 30                                   | 5997 7905                                                                                                                                                                                                                                                                                                                                                                                                                                                                                                                                                                                                                                                                                                                                                                                                                                                                                                                                                                                                                                                                                                                                                                                                                                                                                                                                                                                                                                                                                                                                                                                                                                                                                                                                                                                                                                                                                                                                                                                                                                                                                                                                                                                                                                                                                                                                                                                                                                                                                                                                                                                                                                                                                                                                                                                                                                                                                                                                                                                                                                                                                                                                                                                                                                                                                                                                                                                                                                                                                                                                                                                                        |
| Set 31                                   | 23371 3695                                                                                                                                                                                                                                                                                                                                                                                                                                                                                                                                                                                                                                                                                                                                                                                                                                                                                                                                                                                                                                                                                                                                                                                                                                                                                                                                                                                                                                                                                                                                                                                                                                                                                                                                                                                                                                                                                                                                                                                                                                                                                                                                                                                                                                                                                                                                                                                                                                                                                                                                                                                                                                                                                                                                                                                                                                                                                                                                                                                                                                                                                                                                                                                                                                                                                                                                                                                                                                                                                                                                                                                                       |
| Set 32                                   | 345757 3932                                                                                                                                                                                                                                                                                                                                                                                                                                                                                                                                                                                                                                                                                                                                                                                                                                                                                                                                                                                                                                                                                                                                                                                                                                                                                                                                                                                                                                                                                                                                                                                                                                                                                                                                                                                                                                                                                                                                                                                                                                                                                                                                                                                                                                                                                                                                                                                                                                                                                                                                                                                                                                                                                                                                                                                                                                                                                                                                                                                                                                                                                                                                                                                                                                                                                                                                                                                                                                                                                                                                                                                                      |



|        |             |
|--------|-------------|
| Set 33 | 6048 7922   |
| Set 34 | 4068 114836 |
| Set 35 | 55740 6195  |
| Set 36 | 51256 7249  |
| Set 37 | 83394 2185  |
| Set 38 | 283455 1326 |
| Set 39 | 6645 23139  |
| Set 40 | 950 7057    |

---

**Supplementary Table8.** The list of GO annotations for the protein sets affected by H-RAS G13, Q61 perturbation.

| <b>HRAS G13, Q61 provoked GO functions</b> |                                                        |
|--------------------------------------------|--------------------------------------------------------|
| Response to UV                             | response to UV                                         |
| Protein Polymerization                     | protein tetramerization                                |
|                                            | positive regulation of actin filament polymerization   |
|                                            | regulation of actin polymerization or depolymerization |
|                                            | regulation of actin filament polymerization            |
| Metabolic Processes                        | regulation of protein polymerization                   |
|                                            | nitric oxide metabolic process                         |
| T cell apoptosis/homeostasis               | arginine metabolic process                             |
|                                            | activation-induced cell death of T cells               |
|                                            | T cell homeostasis                                     |
| Regulatory Processes                       | T cell apoptosis                                       |
|                                            | regulation of telomere maintenance                     |
|                                            | regulation of survival gene product expression         |
| Others                                     | positive regulation of multicellular organism growth   |
|                                            | response to hydrogen peroxide                          |
|                                            | neuron maturation                                      |
|                                            | immunoglobulin biosynthetic process                    |
|                                            | microspike assembly                                    |
|                                            | response to food                                       |
|                                            | mitochondrion organization                             |

**Supplementary Table9.** The list of protein sets (in Entrez Gene ID) affected by H-RAS G 13, Q61 perturbation.

**HRAS G13/Q61 mutation disturbed protein sets**

|             |                                                                                                                                                                                                                                                                                                                                                                                                                                                                                                                                                                                                                                                                                                                                                                                                                                                                                                                                                                                                                                                                                                                                                                                                                                                                                                                                                                                                                                                                                                                                                                                                                                                                                                                                                                                                                                                                                                                                                                                                                                                                                                                                                                                                                                                                                                                                                                                                                                                                                                                                                                                                                                                                                                                                                                                                                                                                                                                                                                                                                                                                                                                                                                                                                                                                                                                                                                                                                                                                                                                                                                                                                                                                                                                                      |
|-------------|--------------------------------------------------------------------------------------------------------------------------------------------------------------------------------------------------------------------------------------------------------------------------------------------------------------------------------------------------------------------------------------------------------------------------------------------------------------------------------------------------------------------------------------------------------------------------------------------------------------------------------------------------------------------------------------------------------------------------------------------------------------------------------------------------------------------------------------------------------------------------------------------------------------------------------------------------------------------------------------------------------------------------------------------------------------------------------------------------------------------------------------------------------------------------------------------------------------------------------------------------------------------------------------------------------------------------------------------------------------------------------------------------------------------------------------------------------------------------------------------------------------------------------------------------------------------------------------------------------------------------------------------------------------------------------------------------------------------------------------------------------------------------------------------------------------------------------------------------------------------------------------------------------------------------------------------------------------------------------------------------------------------------------------------------------------------------------------------------------------------------------------------------------------------------------------------------------------------------------------------------------------------------------------------------------------------------------------------------------------------------------------------------------------------------------------------------------------------------------------------------------------------------------------------------------------------------------------------------------------------------------------------------------------------------------------------------------------------------------------------------------------------------------------------------------------------------------------------------------------------------------------------------------------------------------------------------------------------------------------------------------------------------------------------------------------------------------------------------------------------------------------------------------------------------------------------------------------------------------------------------------------------------------------------------------------------------------------------------------------------------------------------------------------------------------------------------------------------------------------------------------------------------------------------------------------------------------------------------------------------------------------------------------------------------------------------------------------------------------------|
| Gene Set 1  | 65095 134728 123920 6721 83937 10513 9777 10458 27289 3556 3554 7305 95 11261 11260 1946 4140 26015 3998 54915 3993 2912 11186 85406 7128 6093 10209 5267 916 2318 81539 51168 1063 5303 5269 55227 154796 4830 56241 5911 5910 5912 57118 1937 4656 274 3145 6383 6382 2547 2549 91754 114609 6478 1527 81622 2263 2260 200894 529 79665 10333 115207 8667 445 8519 1949 51507 103 23541 23095 5774 5777 2046 85021 11006 1843 2049 9411 26128 9649 434 7161 2160 54496 54540 10411 10146 11266 11340 23242 7265 100820829 7266 266747 847 3635 23433 6610 10567 2633 6614 9021 10841 5229 84941 5818 5819 5792 22882 23184 56302 55971 90864 3064 3069 4615 23263 2342 7074 230 6103 5457 5924 9278 6881 5921 1759 5923 29765 157310 29760 29763 5788 613 4254 54106 10879 3703 644 85377 4916 91662 29109 7189 64127 1476 8649 90462 81609 8427 6440 9368 9369 54453 9363 22931 23564 23613 22837 56896 9833 340205 7694 1373 403 402 23643 930 25945 7441 84632 84631 79574 3265 50855 6714 3562 3563 3249 3566 51374 84331 3565 93145 51277 3845 54514 54922 54518 7529 6655 8976 6654 6850 285971 2909 84446 393 392 88 390 10235 394 928 5257 2146 6789 6788 6660 51196 6259 5315 27143 5585 64848 84206 3665 585 583 64112 117248 152831 924 79695 1438 1439 8729 10900 291 1003 8503 8502 2590 64284 9240 57403 283349 23558 23559 79577 8291 971 178 6921 6923 53916 975 11156 2886 2057 2885 2059 6285 2888 6281 3697 183 57106 2 23015 185 5869 26036 1509 3083 5868 2622 53343 2769 57085 22800 5894 10395 11336 11339 5899 23233 9093 5104 19 92609 27037 867 84181 6386 5863 28956 9138 3082 84067 2690 3146 3903 55201 83593 889 203259 4763 6628 10430 10572 356 1613 342371 55704 50628 5803 51497 8844 2876 207 81793 204851 7108 9922 166379 1047 5364 5365 2339 7064 5934 55568 150084 4301 9479 57521 23043 23040 5781 5898 22808 3654 11059 3656 2099 29984 6002 2487 85463 117178 64979 8658 8651 57142 2242 995 994 993 5345 23767 5147 9372 998 5140 4887 7535 22920 51562 8531 4233 4232 56886 3416 1400 5595 7444 5597 5596 5599 170685 55644 2147 929 4609 91608 259173 921 923 1380 925 23286 10332 23463 4214 9094 55323 150372 221527 387755 6709 23265 9657 23301 9712 10434 10125 833 3579 51365 5090 4289 3570 369 80351 64759 382 27 387 388 5270 5328 3818 5872 9965 54622 5871 5876 5877 5879 50618 51225 6477 60485 576 575 56997 56288 7096 7097 2202 64581 81607 2560 5900 7098 7099 10912 115352 51135 115727 6271 7294 30000 10313 10640 57002 8260 11069 5909 4682 11140 80176 3683 11060 1454 163033 166824 219790 57176 1514 80270 9616 10006 9610 5294 54476 5293 5290 54472 5880 51411 59349 246330 5055 27185 9223 9818 51555 2036 6224 3183 4843 54994 55603 326624 9550 114790 23450 9047 9046 10469 26469 4155 4012 11252 55770 80305 84313 952 64787 7111 24148 80739 55914 4703 114132 6641 1070 81488 5906 84552 54756 5908 10818 286 7802 23071 673 29993 6011 29124 6014 6016 6018 6390 25890 401409 79738 29907 63928 2778 10049 8036 23677 4893 983 2773 2775 2776 5605 5604 10072 5601 5602 8522 22913 7879 8525 4800 1850 5565 59307 89797 353376 9467 534 9463 421 829 23179 6300 6303 26019 309 3959 3958 3816 3817 3815 3953 302 3956 11213 10781 10787 10038 4110 3266 9644 11218 284996 51429 80817 4294 22866 54437 51028 80342 131890 84665 10048 71 84662 117583 5331 5336 7016 5338 10253 399687 10256 27241 2905 6768 1730 84612 5780 481 5783 54386 51735 5563 55319 140691 60493 29899 229 1033 226 149371 7163 1184 91404 388228 6693 10928 23533 23109 54869 9459 9101 6549 3739 5528 634 3732 3730 4926 951 953 11178 9770 57162 1445 57161 1114 23037 81848 1448 5289 5163 2589 22827 8411 5739 6237 22821 377630 51606 1809 84767 84164 9519 9693 4582 |
| Gene Set 2  | 10718 84951 420 84256 400745 57489 2064 3937 115209 100124696 2069 1956 2066 116449 8412 9542 2065 27071                                                                                                                                                                                                                                                                                                                                                                                                                                                                                                                                                                                                                                                                                                                                                                                                                                                                                                                                                                                                                                                                                                                                                                                                                                                                                                                                                                                                                                                                                                                                                                                                                                                                                                                                                                                                                                                                                                                                                                                                                                                                                                                                                                                                                                                                                                                                                                                                                                                                                                                                                                                                                                                                                                                                                                                                                                                                                                                                                                                                                                                                                                                                                                                                                                                                                                                                                                                                                                                                                                                                                                                                                             |
| Gene Set 3  | 5159 5155 5154 1845 11333 417                                                                                                                                                                                                                                                                                                                                                                                                                                                                                                                                                                                                                                                                                                                                                                                                                                                                                                                                                                                                                                                                                                                                                                                                                                                                                                                                                                                                                                                                                                                                                                                                                                                                                                                                                                                                                                                                                                                                                                                                                                                                                                                                                                                                                                                                                                                                                                                                                                                                                                                                                                                                                                                                                                                                                                                                                                                                                                                                                                                                                                                                                                                                                                                                                                                                                                                                                                                                                                                                                                                                                                                                                                                                                                        |
| Gene Set 4  | 165918 3688 9135 23011 83452 27342                                                                                                                                                                                                                                                                                                                                                                                                                                                                                                                                                                                                                                                                                                                                                                                                                                                                                                                                                                                                                                                                                                                                                                                                                                                                                                                                                                                                                                                                                                                                                                                                                                                                                                                                                                                                                                                                                                                                                                                                                                                                                                                                                                                                                                                                                                                                                                                                                                                                                                                                                                                                                                                                                                                                                                                                                                                                                                                                                                                                                                                                                                                                                                                                                                                                                                                                                                                                                                                                                                                                                                                                                                                                                                   |
| Gene Set 5  | 1364 1945 1969 1944 2041                                                                                                                                                                                                                                                                                                                                                                                                                                                                                                                                                                                                                                                                                                                                                                                                                                                                                                                                                                                                                                                                                                                                                                                                                                                                                                                                                                                                                                                                                                                                                                                                                                                                                                                                                                                                                                                                                                                                                                                                                                                                                                                                                                                                                                                                                                                                                                                                                                                                                                                                                                                                                                                                                                                                                                                                                                                                                                                                                                                                                                                                                                                                                                                                                                                                                                                                                                                                                                                                                                                                                                                                                                                                                                             |
| Gene Set 6  | 220164 5979 4902 2674 2668                                                                                                                                                                                                                                                                                                                                                                                                                                                                                                                                                                                                                                                                                                                                                                                                                                                                                                                                                                                                                                                                                                                                                                                                                                                                                                                                                                                                                                                                                                                                                                                                                                                                                                                                                                                                                                                                                                                                                                                                                                                                                                                                                                                                                                                                                                                                                                                                                                                                                                                                                                                                                                                                                                                                                                                                                                                                                                                                                                                                                                                                                                                                                                                                                                                                                                                                                                                                                                                                                                                                                                                                                                                                                                           |
| Gene Set 7  | 3301 7851 858 2804 2319                                                                                                                                                                                                                                                                                                                                                                                                                                                                                                                                                                                                                                                                                                                                                                                                                                                                                                                                                                                                                                                                                                                                                                                                                                                                                                                                                                                                                                                                                                                                                                                                                                                                                                                                                                                                                                                                                                                                                                                                                                                                                                                                                                                                                                                                                                                                                                                                                                                                                                                                                                                                                                                                                                                                                                                                                                                                                                                                                                                                                                                                                                                                                                                                                                                                                                                                                                                                                                                                                                                                                                                                                                                                                                              |
| Gene Set 8  | 7706 50852 7051 5920 28998                                                                                                                                                                                                                                                                                                                                                                                                                                                                                                                                                                                                                                                                                                                                                                                                                                                                                                                                                                                                                                                                                                                                                                                                                                                                                                                                                                                                                                                                                                                                                                                                                                                                                                                                                                                                                                                                                                                                                                                                                                                                                                                                                                                                                                                                                                                                                                                                                                                                                                                                                                                                                                                                                                                                                                                                                                                                                                                                                                                                                                                                                                                                                                                                                                                                                                                                                                                                                                                                                                                                                                                                                                                                                                           |
| Gene Set 9  | 4055 26173 10522 2273                                                                                                                                                                                                                                                                                                                                                                                                                                                                                                                                                                                                                                                                                                                                                                                                                                                                                                                                                                                                                                                                                                                                                                                                                                                                                                                                                                                                                                                                                                                                                                                                                                                                                                                                                                                                                                                                                                                                                                                                                                                                                                                                                                                                                                                                                                                                                                                                                                                                                                                                                                                                                                                                                                                                                                                                                                                                                                                                                                                                                                                                                                                                                                                                                                                                                                                                                                                                                                                                                                                                                                                                                                                                                                                |
| Gene Set 10 | 1436 146433 8563 27258                                                                                                                                                                                                                                                                                                                                                                                                                                                                                                                                                                                                                                                                                                                                                                                                                                                                                                                                                                                                                                                                                                                                                                                                                                                                                                                                                                                                                                                                                                                                                                                                                                                                                                                                                                                                                                                                                                                                                                                                                                                                                                                                                                                                                                                                                                                                                                                                                                                                                                                                                                                                                                                                                                                                                                                                                                                                                                                                                                                                                                                                                                                                                                                                                                                                                                                                                                                                                                                                                                                                                                                                                                                                                                               |
| Gene Set 11 | 399664 493856 596                                                                                                                                                                                                                                                                                                                                                                                                                                                                                                                                                                                                                                                                                                                                                                                                                                                                                                                                                                                                                                                                                                                                                                                                                                                                                                                                                                                                                                                                                                                                                                                                                                                                                                                                                                                                                                                                                                                                                                                                                                                                                                                                                                                                                                                                                                                                                                                                                                                                                                                                                                                                                                                                                                                                                                                                                                                                                                                                                                                                                                                                                                                                                                                                                                                                                                                                                                                                                                                                                                                                                                                                                                                                                                                    |
| Gene Set 12 | 3084 1950 7448                                                                                                                                                                                                                                                                                                                                                                                                                                                                                                                                                                                                                                                                                                                                                                                                                                                                                                                                                                                                                                                                                                                                                                                                                                                                                                                                                                                                                                                                                                                                                                                                                                                                                                                                                                                                                                                                                                                                                                                                                                                                                                                                                                                                                                                                                                                                                                                                                                                                                                                                                                                                                                                                                                                                                                                                                                                                                                                                                                                                                                                                                                                                                                                                                                                                                                                                                                                                                                                                                                                                                                                                                                                                                                                       |
| Gene Set 13 | 9365 3480 151295                                                                                                                                                                                                                                                                                                                                                                                                                                                                                                                                                                                                                                                                                                                                                                                                                                                                                                                                                                                                                                                                                                                                                                                                                                                                                                                                                                                                                                                                                                                                                                                                                                                                                                                                                                                                                                                                                                                                                                                                                                                                                                                                                                                                                                                                                                                                                                                                                                                                                                                                                                                                                                                                                                                                                                                                                                                                                                                                                                                                                                                                                                                                                                                                                                                                                                                                                                                                                                                                                                                                                                                                                                                                                                                     |
| Gene Set 14 | 27352 399823 4771                                                                                                                                                                                                                                                                                                                                                                                                                                                                                                                                                                                                                                                                                                                                                                                                                                                                                                                                                                                                                                                                                                                                                                                                                                                                                                                                                                                                                                                                                                                                                                                                                                                                                                                                                                                                                                                                                                                                                                                                                                                                                                                                                                                                                                                                                                                                                                                                                                                                                                                                                                                                                                                                                                                                                                                                                                                                                                                                                                                                                                                                                                                                                                                                                                                                                                                                                                                                                                                                                                                                                                                                                                                                                                                    |
| Gene Set 15 | 9367 2664 6009                                                                                                                                                                                                                                                                                                                                                                                                                                                                                                                                                                                                                                                                                                                                                                                                                                                                                                                                                                                                                                                                                                                                                                                                                                                                                                                                                                                                                                                                                                                                                                                                                                                                                                                                                                                                                                                                                                                                                                                                                                                                                                                                                                                                                                                                                                                                                                                                                                                                                                                                                                                                                                                                                                                                                                                                                                                                                                                                                                                                                                                                                                                                                                                                                                                                                                                                                                                                                                                                                                                                                                                                                                                                                                                       |
| Gene Set 16 | 7454 257364 8751                                                                                                                                                                                                                                                                                                                                                                                                                                                                                                                                                                                                                                                                                                                                                                                                                                                                                                                                                                                                                                                                                                                                                                                                                                                                                                                                                                                                                                                                                                                                                                                                                                                                                                                                                                                                                                                                                                                                                                                                                                                                                                                                                                                                                                                                                                                                                                                                                                                                                                                                                                                                                                                                                                                                                                                                                                                                                                                                                                                                                                                                                                                                                                                                                                                                                                                                                                                                                                                                                                                                                                                                                                                                                                                     |
| Gene Set 17 | 7424 3791 2324                                                                                                                                                                                                                                                                                                                                                                                                                                                                                                                                                                                                                                                                                                                                                                                                                                                                                                                                                                                                                                                                                                                                                                                                                                                                                                                                                                                                                                                                                                                                                                                                                                                                                                                                                                                                                                                                                                                                                                                                                                                                                                                                                                                                                                                                                                                                                                                                                                                                                                                                                                                                                                                                                                                                                                                                                                                                                                                                                                                                                                                                                                                                                                                                                                                                                                                                                                                                                                                                                                                                                                                                                                                                                                                       |
| Gene Set 18 | 25804 2922 6635                                                                                                                                                                                                                                                                                                                                                                                                                                                                                                                                                                                                                                                                                                                                                                                                                                                                                                                                                                                                                                                                                                                                                                                                                                                                                                                                                                                                                                                                                                                                                                                                                                                                                                                                                                                                                                                                                                                                                                                                                                                                                                                                                                                                                                                                                                                                                                                                                                                                                                                                                                                                                                                                                                                                                                                                                                                                                                                                                                                                                                                                                                                                                                                                                                                                                                                                                                                                                                                                                                                                                                                                                                                                                                                      |
| Gene Set 19 | 8772 826 85444                                                                                                                                                                                                                                                                                                                                                                                                                                                                                                                                                                                                                                                                                                                                                                                                                                                                                                                                                                                                                                                                                                                                                                                                                                                                                                                                                                                                                                                                                                                                                                                                                                                                                                                                                                                                                                                                                                                                                                                                                                                                                                                                                                                                                                                                                                                                                                                                                                                                                                                                                                                                                                                                                                                                                                                                                                                                                                                                                                                                                                                                                                                                                                                                                                                                                                                                                                                                                                                                                                                                                                                                                                                                                                                       |
| Gene Set 20 | 84643 6780 91057                                                                                                                                                                                                                                                                                                                                                                                                                                                                                                                                                                                                                                                                                                                                                                                                                                                                                                                                                                                                                                                                                                                                                                                                                                                                                                                                                                                                                                                                                                                                                                                                                                                                                                                                                                                                                                                                                                                                                                                                                                                                                                                                                                                                                                                                                                                                                                                                                                                                                                                                                                                                                                                                                                                                                                                                                                                                                                                                                                                                                                                                                                                                                                                                                                                                                                                                                                                                                                                                                                                                                                                                                                                                                                                     |
| Gene Set 21 | 84174 1435 919                                                                                                                                                                                                                                                                                                                                                                                                                                                                                                                                                                                                                                                                                                                                                                                                                                                                                                                                                                                                                                                                                                                                                                                                                                                                                                                                                                                                                                                                                                                                                                                                                                                                                                                                                                                                                                                                                                                                                                                                                                                                                                                                                                                                                                                                                                                                                                                                                                                                                                                                                                                                                                                                                                                                                                                                                                                                                                                                                                                                                                                                                                                                                                                                                                                                                                                                                                                                                                                                                                                                                                                                                                                                                                                       |
| Gene Set 22 | 27165 55824 6640                                                                                                                                                                                                                                                                                                                                                                                                                                                                                                                                                                                                                                                                                                                                                                                                                                                                                                                                                                                                                                                                                                                                                                                                                                                                                                                                                                                                                                                                                                                                                                                                                                                                                                                                                                                                                                                                                                                                                                                                                                                                                                                                                                                                                                                                                                                                                                                                                                                                                                                                                                                                                                                                                                                                                                                                                                                                                                                                                                                                                                                                                                                                                                                                                                                                                                                                                                                                                                                                                                                                                                                                                                                                                                                     |
| Gene Set 23 | 10044 84433                                                                                                                                                                                                                                                                                                                                                                                                                                                                                                                                                                                                                                                                                                                                                                                                                                                                                                                                                                                                                                                                                                                                                                                                                                                                                                                                                                                                                                                                                                                                                                                                                                                                                                                                                                                                                                                                                                                                                                                                                                                                                                                                                                                                                                                                                                                                                                                                                                                                                                                                                                                                                                                                                                                                                                                                                                                                                                                                                                                                                                                                                                                                                                                                                                                                                                                                                                                                                                                                                                                                                                                                                                                                                                                          |
| Gene Set 24 | 10806 7248                                                                                                                                                                                                                                                                                                                                                                                                                                                                                                                                                                                                                                                                                                                                                                                                                                                                                                                                                                                                                                                                                                                                                                                                                                                                                                                                                                                                                                                                                                                                                                                                                                                                                                                                                                                                                                                                                                                                                                                                                                                                                                                                                                                                                                                                                                                                                                                                                                                                                                                                                                                                                                                                                                                                                                                                                                                                                                                                                                                                                                                                                                                                                                                                                                                                                                                                                                                                                                                                                                                                                                                                                                                                                                                           |
| Gene Set 25 | 26228 7006                                                                                                                                                                                                                                                                                                                                                                                                                                                                                                                                                                                                                                                                                                                                                                                                                                                                                                                                                                                                                                                                                                                                                                                                                                                                                                                                                                                                                                                                                                                                                                                                                                                                                                                                                                                                                                                                                                                                                                                                                                                                                                                                                                                                                                                                                                                                                                                                                                                                                                                                                                                                                                                                                                                                                                                                                                                                                                                                                                                                                                                                                                                                                                                                                                                                                                                                                                                                                                                                                                                                                                                                                                                                                                                           |
| Gene Set 26 | 558 23371                                                                                                                                                                                                                                                                                                                                                                                                                                                                                                                                                                                                                                                                                                                                                                                                                                                                                                                                                                                                                                                                                                                                                                                                                                                                                                                                                                                                                                                                                                                                                                                                                                                                                                                                                                                                                                                                                                                                                                                                                                                                                                                                                                                                                                                                                                                                                                                                                                                                                                                                                                                                                                                                                                                                                                                                                                                                                                                                                                                                                                                                                                                                                                                                                                                                                                                                                                                                                                                                                                                                                                                                                                                                                                                            |
| Gene Set 27 | 2533 280636                                                                                                                                                                                                                                                                                                                                                                                                                                                                                                                                                                                                                                                                                                                                                                                                                                                                                                                                                                                                                                                                                                                                                                                                                                                                                                                                                                                                                                                                                                                                                                                                                                                                                                                                                                                                                                                                                                                                                                                                                                                                                                                                                                                                                                                                                                                                                                                                                                                                                                                                                                                                                                                                                                                                                                                                                                                                                                                                                                                                                                                                                                                                                                                                                                                                                                                                                                                                                                                                                                                                                                                                                                                                                                                          |
| Gene Set 28 | 8543 10461                                                                                                                                                                                                                                                                                                                                                                                                                                                                                                                                                                                                                                                                                                                                                                                                                                                                                                                                                                                                                                                                                                                                                                                                                                                                                                                                                                                                                                                                                                                                                                                                                                                                                                                                                                                                                                                                                                                                                                                                                                                                                                                                                                                                                                                                                                                                                                                                                                                                                                                                                                                                                                                                                                                                                                                                                                                                                                                                                                                                                                                                                                                                                                                                                                                                                                                                                                                                                                                                                                                                                                                                                                                                                                                           |
| Gene Set 29 | 5590 23258                                                                                                                                                                                                                                                                                                                                                                                                                                                                                                                                                                                                                                                                                                                                                                                                                                                                                                                                                                                                                                                                                                                                                                                                                                                                                                                                                                                                                                                                                                                                                                                                                                                                                                                                                                                                                                                                                                                                                                                                                                                                                                                                                                                                                                                                                                                                                                                                                                                                                                                                                                                                                                                                                                                                                                                                                                                                                                                                                                                                                                                                                                                                                                                                                                                                                                                                                                                                                                                                                                                                                                                                                                                                                                                           |

Gene Set 30 345757 3932  
Gene Set 31 6048 7922  
Gene Set 32 4068 114836  
Gene Set 33 8224 6853  
Gene Set 34 55740 6195  
Gene Set 35 8440 171177  
Gene Set 36 283455 1326  
Gene Set 37 6645 23139  
Gene Set 38 2167 52  
Gene Set 39 1674 9212

---

**Supplementary Table 10.** The list of GO annotations for the protein sets affected by H-RAS A59 perturbation.

| <b>HRAS A59 provoked GO functions</b> |                                                                                                                                                                                                                                                                                                                                                                                                                                                                                                                                                                                                                                                                                                                      |
|---------------------------------------|----------------------------------------------------------------------------------------------------------------------------------------------------------------------------------------------------------------------------------------------------------------------------------------------------------------------------------------------------------------------------------------------------------------------------------------------------------------------------------------------------------------------------------------------------------------------------------------------------------------------------------------------------------------------------------------------------------------------|
| GPCR signalling                       | regulation of G-protein coupled receptor protein signaling pathway<br>activation of phospholipase C activity by metabotropic glutamate receptor signaling pathway<br>glutamate signaling pathway<br>metabotropic glutamate receptor signaling pathway                                                                                                                                                                                                                                                                                                                                                                                                                                                                |
| Homeostasis                           | di-, tri-valent inorganic anion homeostasis<br>anion homeostasis<br>cellular di-, tri-valent inorganic anion homeostasis<br>cellular anion homeostasis<br>phosphate ion homeostasis<br>cellular phosphate ion homeostasis                                                                                                                                                                                                                                                                                                                                                                                                                                                                                            |
| Differentiation                       | glial cell differentiation<br>myoblast differentiation                                                                                                                                                                                                                                                                                                                                                                                                                                                                                                                                                                                                                                                               |
| Growth                                | regulation of organ growth<br>regulation of cardiac muscle growth                                                                                                                                                                                                                                                                                                                                                                                                                                                                                                                                                                                                                                                    |
| Development                           | tongue development<br>induction of an organ<br>sensory organ development<br>metanephros development<br>developmental induction<br>gut development<br>ureteric bud development<br>cell fate specification<br>cell fate commitment<br>odontogenesis<br>gliogenesis<br>ossification<br>cell-cell signaling involved in cell fate specification<br>regulation of cardiac muscle tissue development                                                                                                                                                                                                                                                                                                                       |
| Virus & host                          | regulation of cAMP-mediated signaling<br>interaction with symbiont<br>virus-host interaction                                                                                                                                                                                                                                                                                                                                                                                                                                                                                                                                                                                                                         |
| Response to Stimulus                  | calcium-mediated signaling<br>regulation of response to biotic stimulus<br>response to exogenous dsRNA                                                                                                                                                                                                                                                                                                                                                                                                                                                                                                                                                                                                               |
| Transport                             | protein import into nucleus, translocation<br>regulation of ion transport<br>membrane docking<br>energy coupled proton transport, against electrochemical gradient<br>regulation of ion transmembrane transport<br>negative regulation of ryanodine-sensitive calcium-release channel activity<br>vesicle docking<br>ATP hydrolysis coupled proton transport<br>regulation of transmembrane transport<br>regulation of transmembrane transporter activity<br>positive regulation of transporter activity<br>positive regulation of transporter activity<br>regulation of metal ion transport<br>positive regulation of ion transmembrane transporter activity<br>protein targeting<br>substrate-bound cell migration |

|                   |                                                                                                                                                                                                                                                                                                                                                                                                                                                                      |
|-------------------|----------------------------------------------------------------------------------------------------------------------------------------------------------------------------------------------------------------------------------------------------------------------------------------------------------------------------------------------------------------------------------------------------------------------------------------------------------------------|
|                   | regulation of ion transmembrane transporter activity                                                                                                                                                                                                                                                                                                                                                                                                                 |
| Catabolic Process | regulation of catabolic process<br>negative regulation of catabolic process<br>regulation of protein catabolic process<br>regulation of cyclin-dependent protein kinase activity<br>negative regulation of protein catabolic process                                                                                                                                                                                                                                 |
| Proliferation     | regulation of cardiac muscle cell proliferation<br>positive regulation of cardiac muscle cell proliferation                                                                                                                                                                                                                                                                                                                                                          |
| VEGFR signalling  | positive regulation of vascular endothelial growth factor receptor signaling pathway<br>regulation of vascular endothelial growth factor receptor signaling pathway                                                                                                                                                                                                                                                                                                  |
| Others            | actin filament polymerization<br>male sex determination<br>positive regulation of nitric oxide biosynthetic process<br>negative regulation of cell-cell adhesion<br>zymogen activation<br>negative regulation of protein modification process<br>T cell activation via T cell receptor contact with antigen bound to MHC molecule on antigen presenting cell<br>negative regulation of cellular protein metabolic process<br>positive regulation of neuron apoptosis |

**Supplementary Table 11.** The list of protein sets (in Entrez Gene ID) affected by H-RAS A59 perturbation.

| <b>HRAS A59 mutation disturbed protein sets</b> |                                                                                                                                                                                                                                                                                                                                                                                                                                                                                                                                                                                                                                                                                                                                                                                                                                                                                                                                                                                                                                                                                                                                                                                                                                                                                                                                                                                                                                                                                                                                                                                                                                                                                                                                                                                                                                                                                                                                                                                                                                                                                                                                                                                                                                                                                                                                                                                                                                                                                                                                                                                                                                                                                                                                                                                                                                                                                                                                                                                                                                                                                                                                                                                                                                                                                                                                                                                                                                                                                                                                                                                                                                                                                                                                 |
|-------------------------------------------------|---------------------------------------------------------------------------------------------------------------------------------------------------------------------------------------------------------------------------------------------------------------------------------------------------------------------------------------------------------------------------------------------------------------------------------------------------------------------------------------------------------------------------------------------------------------------------------------------------------------------------------------------------------------------------------------------------------------------------------------------------------------------------------------------------------------------------------------------------------------------------------------------------------------------------------------------------------------------------------------------------------------------------------------------------------------------------------------------------------------------------------------------------------------------------------------------------------------------------------------------------------------------------------------------------------------------------------------------------------------------------------------------------------------------------------------------------------------------------------------------------------------------------------------------------------------------------------------------------------------------------------------------------------------------------------------------------------------------------------------------------------------------------------------------------------------------------------------------------------------------------------------------------------------------------------------------------------------------------------------------------------------------------------------------------------------------------------------------------------------------------------------------------------------------------------------------------------------------------------------------------------------------------------------------------------------------------------------------------------------------------------------------------------------------------------------------------------------------------------------------------------------------------------------------------------------------------------------------------------------------------------------------------------------------------------------------------------------------------------------------------------------------------------------------------------------------------------------------------------------------------------------------------------------------------------------------------------------------------------------------------------------------------------------------------------------------------------------------------------------------------------------------------------------------------------------------------------------------------------------------------------------------------------------------------------------------------------------------------------------------------------------------------------------------------------------------------------------------------------------------------------------------------------------------------------------------------------------------------------------------------------------------------------------------------------------------------------------------------------|
|                                                 | 134728 123920 6721 83937 10457 10513 5563 9771 9770 10879 3554 11260 11266 55763 1527 3998 54915<br>54737 2912 11186 9463 1794 85406 10200 3339 51160 916 2318 81539 51168 1063 6654 2312 5269 55227<br>56241 5911 5910 291 4656 274 3145 6383 6382 3672 5818 2547 3383 2549 114609 26258 81622 2263 2260<br>200894 529 2264 10332 10333 115207 25890 8667 4218 445 8751 51507 103 23541 5774 5777 2046 2045<br>11006 1843 6278 1845 2049 9411 644 3265 2167 2160 54496 114132 51678 11340 5133 23242 7265 51028<br>7266 266747 23433 6610 10567 5290 6614 95 10841 5229 59349 5819 8936 5792 22882 51411 3635 56302<br>55971 7171 90864 3069 4615 2915 2342 7074 230 2224 6103 5924 1759 5923 29765 157310 29760 29763<br>64398 613 9113 4254 54106 3703 4509 85377 947 91662 29109 7189 64127 1476 2533 81609 8427 7128<br>9368 9369 54453 9363 22931 23613 22837 7456 7454 6478 5582 9833 55052 6477 7694 1373 403 402<br>25945 56886 84631 79574 5991 1953 6714 183 3562 3563 3249 51375 51374 84331 9901 22843 51277 3845<br>54514 54922 54518 7529 6655 8976 5303 6850 2905 84446 393 88 10235 3304 928 793 5257 6789 6788<br>5311 51196 27143 27 64848 84206 3665 79890 585 583 4140 64112 117248 93343 90423 1435 152831<br>79695 1439 8729 10900 5912 4188 8503 8502 2590 57403 283349 50856 8291 178 53916 11156 2057 2885<br>2059 7827 2888 6281 3697 9094 57106 2 23015 185 5780 26036 3083 55644 53343 2769 146722 57085<br>22800 11333 5894 11336 5898 22808 23233 5104 19 92609 4214 84181 51225 28956 84062 9138 3082<br>84067 23263 79720 3146 3903 55201 83593 889 203259 4763 83692 257364 6628 10430 10572 356 1613<br>24148 55704 23338 50628 50624 51497 8844 2876 207 80817 204851 7108 57610 9922 1047 5364 2339<br>7064 5934 55568 4301 9479 57521 23043 23040 5781 11339 5899 3654 3656 29984 6002 695 85461 85463<br>117178 64979 8658 2248 2249 8651 2247 995 994 23607 23767 5147 9372 998 5140 4887 7535 22920<br>10787 51562 8531 4233 7441 3416 1400 5595 7444 5596 170685 2147 929 417 924 925 23286 23287 23463<br>339287 3821 3820 23468 55323 150372 221527 387755 6709 23265 9657 23301 9712 10434 10125 833<br>3579 51365 5090 4289 369 80351 7532 5585 387 388 4703 5328 64859 5872 9965 54622 5876 5877 5878<br>5879 50619 50618 151888 340205 60485 56997 56288 2803 7096 7097 2202 64581 81607 2560 81488 7098<br>7099 115352 51135 115727 26230 89848 7294 30000 23643 10640 160 11069 4682 11140 3683 4830 1454<br>166824 219790 57176 1514 80270 801 10006 9610 4089 5294 54476 5293 2633 54472 170961 5880 5886<br>23184 246330 5055 27185 8817 9818 92369 51555 6224 3183 84174 54994 55212 55603 9550 114790 9047<br>10469 4155 4012 3227 11252 55770 80305 84313 952 64787 7111 80739 55914 10636 5270 10411 6641<br>1070 5900 5906 54756 5908 5909 286 8871 7802 23071 673 29992 29993 26088 6011 29124 6014 6016 302<br>3035 6390 3565 401409 52 534 29907 2255 2254 2253 2252 2251 2250 10048 10049 988 8036 23677 4893<br>64284 2773 5155 2775 2776 5605 5604 10072 5601 5602 8522 22913 7879 8525 4800 5565 89790 59307<br>89797 353376 9467 26015 919 1399 421 829 23179 6300 6303 50807 3959 3958 3953 3818 3956 11213<br>10781 1937 10038 4110 3266 9644 11218 284996 51429 81793 4294 22866 54437 100820829 131890 84665<br>2778 71 84662 117583 5331 5336 7016 5338 10253 399687 10256 27245 6768 1730 8822 84612 5869 5868<br>5783 54386 51735 5863 140691 8773 60493 29899 5154 229 6881 226 149371 91404 388228 9149 6693<br>10928 23533 54869 9454 9456 8074 9101 3739 5528 634 1808 3732 3730 4926 951 953 11178 57162 57161<br>1114 23037 8678 26057 1448 5163 10078 9649 2589 22827 8411 5739 6237 22821 377630 6461 51606 1809<br>84767 84164 9519 9693 4582 |
| Set 1                                           | 84951 84256 420 57489 2064 3937 115209 100124696 400745 1956 2066 116449 8412 9542 2065 27071                                                                                                                                                                                                                                                                                                                                                                                                                                                                                                                                                                                                                                                                                                                                                                                                                                                                                                                                                                                                                                                                                                                                                                                                                                                                                                                                                                                                                                                                                                                                                                                                                                                                                                                                                                                                                                                                                                                                                                                                                                                                                                                                                                                                                                                                                                                                                                                                                                                                                                                                                                                                                                                                                                                                                                                                                                                                                                                                                                                                                                                                                                                                                                                                                                                                                                                                                                                                                                                                                                                                                                                                                                   |
| Set 2                                           | 57118 993 1850 983 6660 54540 5599 1033 6093 8260 90462                                                                                                                                                                                                                                                                                                                                                                                                                                                                                                                                                                                                                                                                                                                                                                                                                                                                                                                                                                                                                                                                                                                                                                                                                                                                                                                                                                                                                                                                                                                                                                                                                                                                                                                                                                                                                                                                                                                                                                                                                                                                                                                                                                                                                                                                                                                                                                                                                                                                                                                                                                                                                                                                                                                                                                                                                                                                                                                                                                                                                                                                                                                                                                                                                                                                                                                                                                                                                                                                                                                                                                                                                                                                         |
| Set 3                                           | 90780 51421 399823 4771 27352 154810 23560 10015                                                                                                                                                                                                                                                                                                                                                                                                                                                                                                                                                                                                                                                                                                                                                                                                                                                                                                                                                                                                                                                                                                                                                                                                                                                                                                                                                                                                                                                                                                                                                                                                                                                                                                                                                                                                                                                                                                                                                                                                                                                                                                                                                                                                                                                                                                                                                                                                                                                                                                                                                                                                                                                                                                                                                                                                                                                                                                                                                                                                                                                                                                                                                                                                                                                                                                                                                                                                                                                                                                                                                                                                                                                                                |
| Set 4                                           | 7706 50852 7051 5920 28998                                                                                                                                                                                                                                                                                                                                                                                                                                                                                                                                                                                                                                                                                                                                                                                                                                                                                                                                                                                                                                                                                                                                                                                                                                                                                                                                                                                                                                                                                                                                                                                                                                                                                                                                                                                                                                                                                                                                                                                                                                                                                                                                                                                                                                                                                                                                                                                                                                                                                                                                                                                                                                                                                                                                                                                                                                                                                                                                                                                                                                                                                                                                                                                                                                                                                                                                                                                                                                                                                                                                                                                                                                                                                                      |
| Set 5                                           | 220164 5979 4902 2674 2668                                                                                                                                                                                                                                                                                                                                                                                                                                                                                                                                                                                                                                                                                                                                                                                                                                                                                                                                                                                                                                                                                                                                                                                                                                                                                                                                                                                                                                                                                                                                                                                                                                                                                                                                                                                                                                                                                                                                                                                                                                                                                                                                                                                                                                                                                                                                                                                                                                                                                                                                                                                                                                                                                                                                                                                                                                                                                                                                                                                                                                                                                                                                                                                                                                                                                                                                                                                                                                                                                                                                                                                                                                                                                                      |
| Set 6                                           | 23011 83452 165918 27342 9135                                                                                                                                                                                                                                                                                                                                                                                                                                                                                                                                                                                                                                                                                                                                                                                                                                                                                                                                                                                                                                                                                                                                                                                                                                                                                                                                                                                                                                                                                                                                                                                                                                                                                                                                                                                                                                                                                                                                                                                                                                                                                                                                                                                                                                                                                                                                                                                                                                                                                                                                                                                                                                                                                                                                                                                                                                                                                                                                                                                                                                                                                                                                                                                                                                                                                                                                                                                                                                                                                                                                                                                                                                                                                                   |
| Set 7                                           | 7448 273 1950 3084                                                                                                                                                                                                                                                                                                                                                                                                                                                                                                                                                                                                                                                                                                                                                                                                                                                                                                                                                                                                                                                                                                                                                                                                                                                                                                                                                                                                                                                                                                                                                                                                                                                                                                                                                                                                                                                                                                                                                                                                                                                                                                                                                                                                                                                                                                                                                                                                                                                                                                                                                                                                                                                                                                                                                                                                                                                                                                                                                                                                                                                                                                                                                                                                                                                                                                                                                                                                                                                                                                                                                                                                                                                                                                              |
| Set 8                                           | 975 930 1820 8519                                                                                                                                                                                                                                                                                                                                                                                                                                                                                                                                                                                                                                                                                                                                                                                                                                                                                                                                                                                                                                                                                                                                                                                                                                                                                                                                                                                                                                                                                                                                                                                                                                                                                                                                                                                                                                                                                                                                                                                                                                                                                                                                                                                                                                                                                                                                                                                                                                                                                                                                                                                                                                                                                                                                                                                                                                                                                                                                                                                                                                                                                                                                                                                                                                                                                                                                                                                                                                                                                                                                                                                                                                                                                                               |
| Set 9                                           | 4055 26173 10522 2273                                                                                                                                                                                                                                                                                                                                                                                                                                                                                                                                                                                                                                                                                                                                                                                                                                                                                                                                                                                                                                                                                                                                                                                                                                                                                                                                                                                                                                                                                                                                                                                                                                                                                                                                                                                                                                                                                                                                                                                                                                                                                                                                                                                                                                                                                                                                                                                                                                                                                                                                                                                                                                                                                                                                                                                                                                                                                                                                                                                                                                                                                                                                                                                                                                                                                                                                                                                                                                                                                                                                                                                                                                                                                                           |
| Set 10                                          | 1436 146433 8563 27258                                                                                                                                                                                                                                                                                                                                                                                                                                                                                                                                                                                                                                                                                                                                                                                                                                                                                                                                                                                                                                                                                                                                                                                                                                                                                                                                                                                                                                                                                                                                                                                                                                                                                                                                                                                                                                                                                                                                                                                                                                                                                                                                                                                                                                                                                                                                                                                                                                                                                                                                                                                                                                                                                                                                                                                                                                                                                                                                                                                                                                                                                                                                                                                                                                                                                                                                                                                                                                                                                                                                                                                                                                                                                                          |
| Set 11                                          | 3993 84552 50855                                                                                                                                                                                                                                                                                                                                                                                                                                                                                                                                                                                                                                                                                                                                                                                                                                                                                                                                                                                                                                                                                                                                                                                                                                                                                                                                                                                                                                                                                                                                                                                                                                                                                                                                                                                                                                                                                                                                                                                                                                                                                                                                                                                                                                                                                                                                                                                                                                                                                                                                                                                                                                                                                                                                                                                                                                                                                                                                                                                                                                                                                                                                                                                                                                                                                                                                                                                                                                                                                                                                                                                                                                                                                                                |
| Set 12                                          | 8440 171177 719                                                                                                                                                                                                                                                                                                                                                                                                                                                                                                                                                                                                                                                                                                                                                                                                                                                                                                                                                                                                                                                                                                                                                                                                                                                                                                                                                                                                                                                                                                                                                                                                                                                                                                                                                                                                                                                                                                                                                                                                                                                                                                                                                                                                                                                                                                                                                                                                                                                                                                                                                                                                                                                                                                                                                                                                                                                                                                                                                                                                                                                                                                                                                                                                                                                                                                                                                                                                                                                                                                                                                                                                                                                                                                                 |
| Set 13                                          | 399664 493856 596                                                                                                                                                                                                                                                                                                                                                                                                                                                                                                                                                                                                                                                                                                                                                                                                                                                                                                                                                                                                                                                                                                                                                                                                                                                                                                                                                                                                                                                                                                                                                                                                                                                                                                                                                                                                                                                                                                                                                                                                                                                                                                                                                                                                                                                                                                                                                                                                                                                                                                                                                                                                                                                                                                                                                                                                                                                                                                                                                                                                                                                                                                                                                                                                                                                                                                                                                                                                                                                                                                                                                                                                                                                                                                               |
| Set 14                                          | 23555 8945 338785                                                                                                                                                                                                                                                                                                                                                                                                                                                                                                                                                                                                                                                                                                                                                                                                                                                                                                                                                                                                                                                                                                                                                                                                                                                                                                                                                                                                                                                                                                                                                                                                                                                                                                                                                                                                                                                                                                                                                                                                                                                                                                                                                                                                                                                                                                                                                                                                                                                                                                                                                                                                                                                                                                                                                                                                                                                                                                                                                                                                                                                                                                                                                                                                                                                                                                                                                                                                                                                                                                                                                                                                                                                                                                               |
| Set 15                                          | 9367 2664 6009                                                                                                                                                                                                                                                                                                                                                                                                                                                                                                                                                                                                                                                                                                                                                                                                                                                                                                                                                                                                                                                                                                                                                                                                                                                                                                                                                                                                                                                                                                                                                                                                                                                                                                                                                                                                                                                                                                                                                                                                                                                                                                                                                                                                                                                                                                                                                                                                                                                                                                                                                                                                                                                                                                                                                                                                                                                                                                                                                                                                                                                                                                                                                                                                                                                                                                                                                                                                                                                                                                                                                                                                                                                                                                                  |
| Set 16                                          | 25804 2922 6635                                                                                                                                                                                                                                                                                                                                                                                                                                                                                                                                                                                                                                                                                                                                                                                                                                                                                                                                                                                                                                                                                                                                                                                                                                                                                                                                                                                                                                                                                                                                                                                                                                                                                                                                                                                                                                                                                                                                                                                                                                                                                                                                                                                                                                                                                                                                                                                                                                                                                                                                                                                                                                                                                                                                                                                                                                                                                                                                                                                                                                                                                                                                                                                                                                                                                                                                                                                                                                                                                                                                                                                                                                                                                                                 |
| Set 17                                          | 3645 3643 5167                                                                                                                                                                                                                                                                                                                                                                                                                                                                                                                                                                                                                                                                                                                                                                                                                                                                                                                                                                                                                                                                                                                                                                                                                                                                                                                                                                                                                                                                                                                                                                                                                                                                                                                                                                                                                                                                                                                                                                                                                                                                                                                                                                                                                                                                                                                                                                                                                                                                                                                                                                                                                                                                                                                                                                                                                                                                                                                                                                                                                                                                                                                                                                                                                                                                                                                                                                                                                                                                                                                                                                                                                                                                                                                  |
| Set 18                                          | 2622 7161                                                                                                                                                                                                                                                                                                                                                                                                                                                                                                                                                                                                                                                                                                                                                                                                                                                                                                                                                                                                                                                                                                                                                                                                                                                                                                                                                                                                                                                                                                                                                                                                                                                                                                                                                                                                                                                                                                                                                                                                                                                                                                                                                                                                                                                                                                                                                                                                                                                                                                                                                                                                                                                                                                                                                                                                                                                                                                                                                                                                                                                                                                                                                                                                                                                                                                                                                                                                                                                                                                                                                                                                                                                                                                                       |
| Set 19                                          | 26228 7006                                                                                                                                                                                                                                                                                                                                                                                                                                                                                                                                                                                                                                                                                                                                                                                                                                                                                                                                                                                                                                                                                                                                                                                                                                                                                                                                                                                                                                                                                                                                                                                                                                                                                                                                                                                                                                                                                                                                                                                                                                                                                                                                                                                                                                                                                                                                                                                                                                                                                                                                                                                                                                                                                                                                                                                                                                                                                                                                                                                                                                                                                                                                                                                                                                                                                                                                                                                                                                                                                                                                                                                                                                                                                                                      |
| Set 20                                          | 558 23371                                                                                                                                                                                                                                                                                                                                                                                                                                                                                                                                                                                                                                                                                                                                                                                                                                                                                                                                                                                                                                                                                                                                                                                                                                                                                                                                                                                                                                                                                                                                                                                                                                                                                                                                                                                                                                                                                                                                                                                                                                                                                                                                                                                                                                                                                                                                                                                                                                                                                                                                                                                                                                                                                                                                                                                                                                                                                                                                                                                                                                                                                                                                                                                                                                                                                                                                                                                                                                                                                                                                                                                                                                                                                                                       |
| Set 21                                          | 5037 7182                                                                                                                                                                                                                                                                                                                                                                                                                                                                                                                                                                                                                                                                                                                                                                                                                                                                                                                                                                                                                                                                                                                                                                                                                                                                                                                                                                                                                                                                                                                                                                                                                                                                                                                                                                                                                                                                                                                                                                                                                                                                                                                                                                                                                                                                                                                                                                                                                                                                                                                                                                                                                                                                                                                                                                                                                                                                                                                                                                                                                                                                                                                                                                                                                                                                                                                                                                                                                                                                                                                                                                                                                                                                                                                       |
| Set 22                                          | 22839 60412                                                                                                                                                                                                                                                                                                                                                                                                                                                                                                                                                                                                                                                                                                                                                                                                                                                                                                                                                                                                                                                                                                                                                                                                                                                                                                                                                                                                                                                                                                                                                                                                                                                                                                                                                                                                                                                                                                                                                                                                                                                                                                                                                                                                                                                                                                                                                                                                                                                                                                                                                                                                                                                                                                                                                                                                                                                                                                                                                                                                                                                                                                                                                                                                                                                                                                                                                                                                                                                                                                                                                                                                                                                                                                                     |
| Set 23                                          |                                                                                                                                                                                                                                                                                                                                                                                                                                                                                                                                                                                                                                                                                                                                                                                                                                                                                                                                                                                                                                                                                                                                                                                                                                                                                                                                                                                                                                                                                                                                                                                                                                                                                                                                                                                                                                                                                                                                                                                                                                                                                                                                                                                                                                                                                                                                                                                                                                                                                                                                                                                                                                                                                                                                                                                                                                                                                                                                                                                                                                                                                                                                                                                                                                                                                                                                                                                                                                                                                                                                                                                                                                                                                                                                 |

|        |             |
|--------|-------------|
| Set 24 | 8543 10461  |
| Set 25 | 5590 23258  |
| Set 26 | 345757 3932 |
| Set 27 | 6048 7922   |
| Set 28 | 4068 114836 |
| Set 29 | 5296 114932 |

---

## References

- 1 Goncalves, V. *et al.* A missense mutation in the APC tumor suppressor gene disrupts an ASF/SF2 splicing enhancer motif and causes pathogenic skipping of exon 14. *Mutation research* **662**, 33-36, doi:10.1016/j.mrfmmm.2008.12.001 (2009).
- 2 Huang, H. *et al.* APC mutations in sporadic medulloblastomas. *The American journal of pathology* **156**, 433-437, doi:10.1016/S0002-9440(10)64747-5 (2000).
- 3 Kourmouli, N., Sun, Y. M., van der Sar, S., Singh, P. B. & Brown, J. P. Epigenetic regulation of mammalian pericentric heterochromatin in vivo by HP1. *Biochemical and biophysical research communications* **337**, 901-907, doi:10.1016/j.bbrc.2005.09.132 (2005).
- 4 Eustermann, S. *et al.* Combinatorial readout of histone H3 modifications specifies localization of ATRX to heterochromatin. *Nature structural & molecular biology* **18**, 777-782, doi:10.1038/nsmb.2070 (2011).
- 5 Levran, O. *et al.* The BRCA1-interacting helicase BRIP1 is deficient in Fanconi anemia. *Nature genetics* **37**, 931-933, doi:10.1038/ng1624 (2005).
- 6 Roy, R., Chun, J. & Powell, S. N. BRCA1 and BRCA2: different roles in a common pathway of genome protection. *Nature reviews. Cancer* **12**, 68-78, doi:10.1038/nrc3181 (2012).
- 7 Makishima, H. *et al.* CBL mutation-related patterns of phosphorylation and sensitivity to tyrosine kinase inhibitors. *Leukemia* **26**, 1547-1554, doi:10.1038/leu.2012.7 (2012).
- 8 Zhang, Z., Elly, C., Qiu, L., Altman, A. & Liu, Y. C. A direct interaction between the adaptor protein Cbl-b and the kinase zap-70 induces a positive signal in T cells. *Current biology : CB* **9**, 203-206 (1999).
